# Supplementary material for: National Stable Isotope Baseline for Precipitation in Malawi to Underpin Integrated Water Resources Management
Source: MDPI journal article supplement (doi:10.3390/w13141927), 2021-07-13
Supplement: s1 [file s1]

Archive with 2 entries (2 files):
- MDPI Water Supplementary Materials Banda et al Isotopes in Precipitation Malawi-JUNE2021.pdf
- MDPI Water Supplementary Materials Banda et al Isotopes in Precipitation Malawi-JUNE2021.xlsx
