# Supplementary material for: National Stable Isotope Baseline for Precipitation in Malawi to Underpin Integrated Water Resources Management
Source: MDPI journal article supplement (doi:10.3390/w13141927), 2021-07-13
Supplement: s1 [file s1 › MDPI Water Supplementary Materials Banda et al Isotopes in Precipitation Malawi-JUNE2021.pdf]

# National Stable Isotope Baseline for Precipitation in Malawi to underpin Integrated Water Resources Management

Limbikani C. Banda<sup>1</sup>, \*, Michael O. Rivett<sup>1</sup>, Anold S.K. Zavison<sup>2</sup>, Sydney Kamtukule<sup>2</sup>, and Robert M. Kalin<sup>1</sup>

## SM Figures

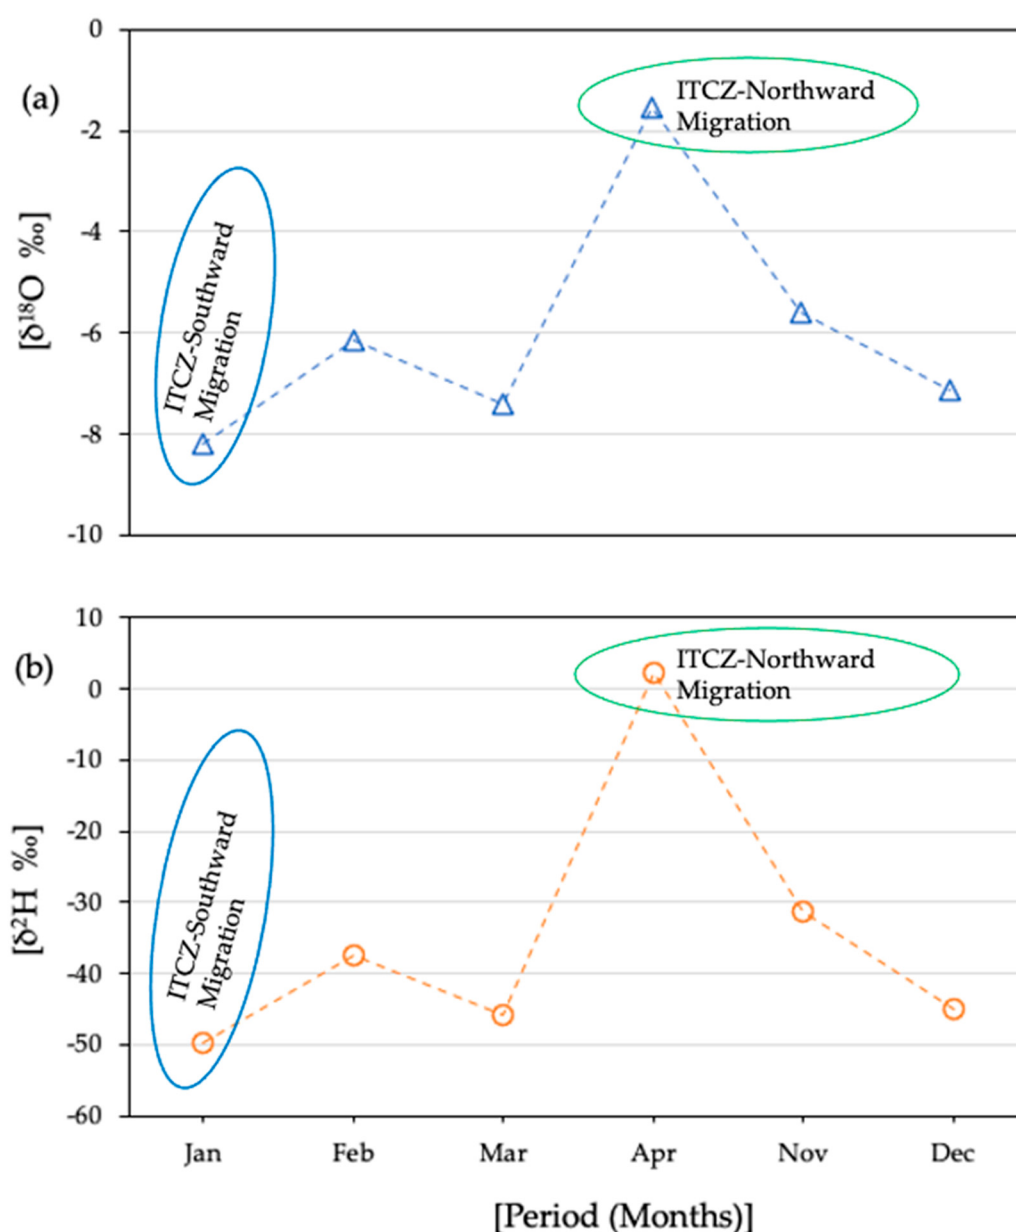

**SM-Figure S1.** Plots of weighted monthly mean values of  $\delta^{18}\text{O}$  (a) and  $\delta^2\text{H}$  (b) recorded at MNIP stations between 2014 and 2019, indicating monthly variations in isotopic signatures of local precipitation.

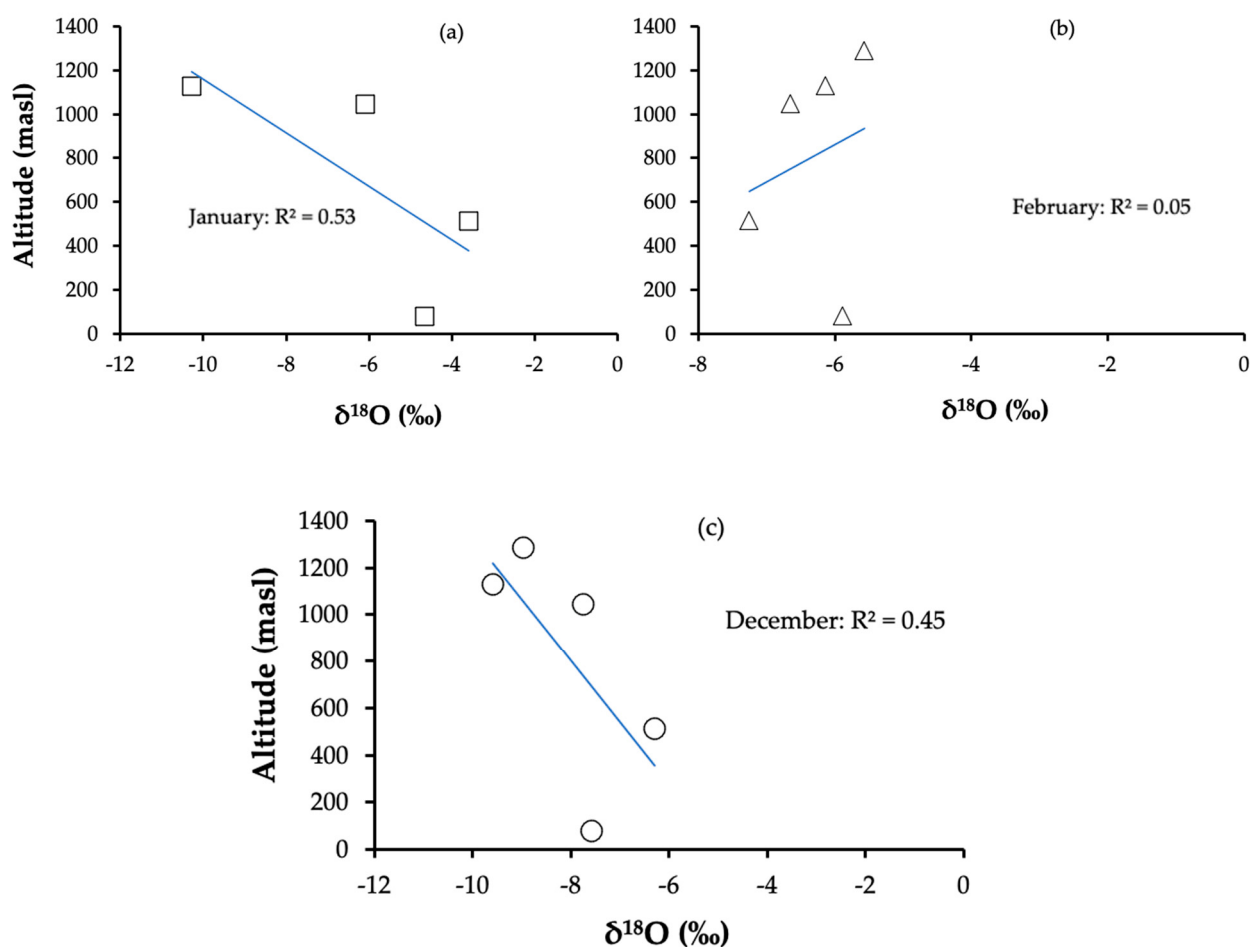

**SM-Figure S2.** Altitude effects on the  $\delta^{18}\text{O}$  signatures of local precipitation in MNIP stations for the months of (a) January (b) February and (c) December over the period 2014-2019.

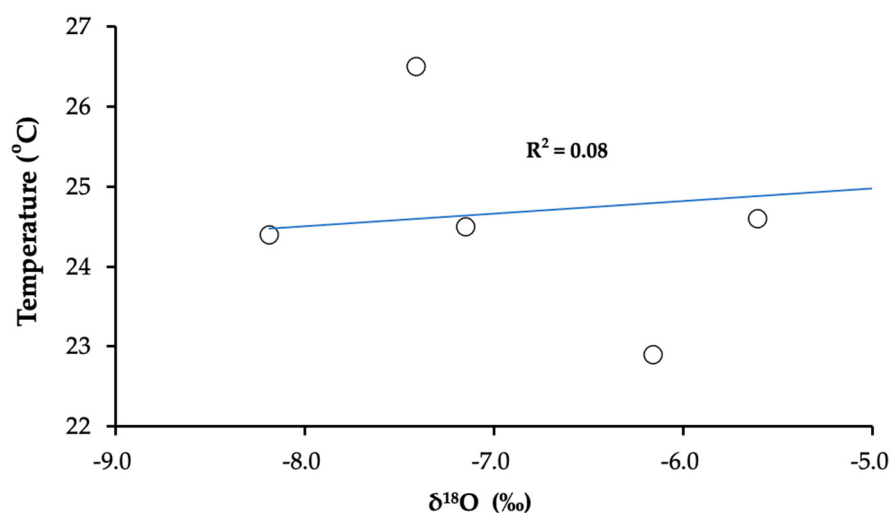

**SM-Figure S3.** Mean temperatures plotted versus  $\delta^{18}\text{O}$  values for all monthly data for the MNIP stations over the period 2014-2019.

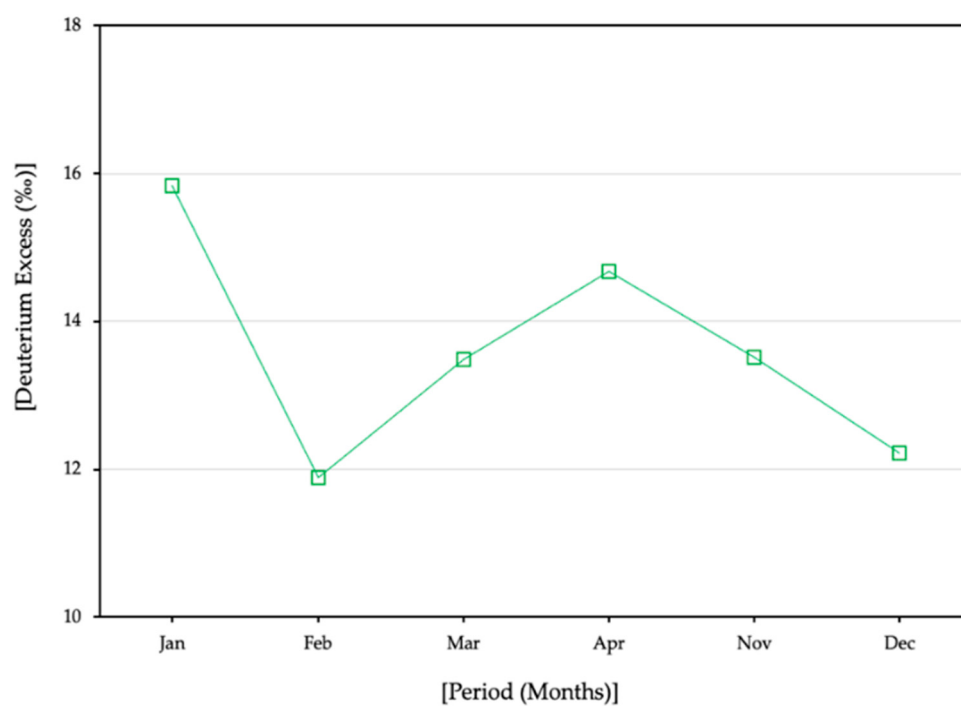

**SM-Figure S4.** Deuterium excess for each month of the wet season recorded at MNIP stations, indicating monthly variations in precipitation derived from weighted mean monthly values over the period 2014-2019.
