# Supplementary material for: National Stable Isotope Baseline for Precipitation in Malawi to Underpin Integrated Water Resources Management
Source: MDPI journal article supplement (doi:10.3390/w13141927), 2021-07-13
Supplement: s1 [file s1 › MDPI Water Supplementary Materials Banda et al Isotopes in Precipitation Malawi-JUNE2021.xlsx]

## Sheet: Dataset I 
Site	Country	Latitude	Longitude	Altitude	Date	O18	H2	D excess
NDOLA	ZM	-13	28.65	1331	11/15/1968	-2.3	-10.6	7.8
NDOLA	ZM	-13	28.65	1331	12/15/1968	-13.05	-97.4	7
NDOLA	ZM	-13	28.65	1331	1/15/1969	-8.07	-47.7	16.86
NDOLA	ZM	-13	28.65	1331	2/15/1969	-17.46	-121.2	18.48
NDOLA	ZM	-13	28.65	1331	3/15/1969	-10.87	-74.9	12.06
NDOLA	ZM	-13	28.65	1331	4/15/1969	-5.88	-34.1	12.94
NDOLA	ZM	-13	28.65	1331	10/15/1969	-8.24	-56.3	9.62
NDOLA	ZM	-13	28.65	1331	11/15/1969	-5.74	-40.6	5.32
NDOLA	ZM	-13	28.65	1331	12/15/1969	-7.24	-42.7	15.22
NDOLA	ZM	-13	28.65	1331	1/15/1970	-5.59	-34.1	10.62
NDOLA	ZM	-13	28.65	1331	2/15/1970	-7.18	-45	12.44
NDOLA	ZM	-13	28.65	1331	3/15/1970	-3.83	-21.8	8.84
NDOLA	ZM	-13	28.65	1331	4/15/1970	-6.07	-41.1	7.46
NDOLA	ZM	-13	28.65	1331	9/15/1970	-7.55	-43.6	16.8
NDOLA	ZM	-13	28.65	1331	10/15/1970	-0.9	3.1	10.3
NDOLA	ZM	-13	28.65	1331	11/15/1970	-5.4	-34.7	8.5
NDOLA	ZM	-13	28.65	1331	12/15/1970	-7.19	-45.9	11.62
NDOLA	ZM	-13	28.65	1331	1/15/1973	-11.74	-78.2	15.72
NDOLA	ZM	-13	28.65	1331	2/15/1973	-4.19	-21.6	11.92
NDOLA	ZM	-13	28.65	1331	3/15/1973	-4.15	-22.1	11.1
NDOLA	ZM	-13	28.65	1331	4/15/1973	-3.77	-22.7	7.46
NDOLA	ZM	-13	28.65	1331	11/15/1974	-3.64	-17.4	11.72
NDOLA	ZM	-13	28.65	1331	12/15/1974	-2.95	-11.3	12.3
NDOLA	ZM	-13	28.65	1331	1/15/1975	-0.51	2.3	6.38
NDOLA	ZM	-13	28.65	1331	2/15/1975	-2.64	-5.5	15.62
NDOLA	ZM	-13	28.65	1331	3/15/1975	-5.59	-28.9	15.82
NDOLA	ZM	-13	28.65	1331	4/15/1975	-3.93	-24.9	6.54
NDOLA	ZM	-13	28.65	1331	11/15/1975	-5.44	-29.1	14.42
NDOLA	ZM	-13	28.65	1331	12/15/1975	-5.21	-34.1	7.58
NDOLA	ZM	-13	28.65	1331	1/15/1976	-10.13	-65.3	15.74
NDOLA	ZM	-13	28.65	1331	2/15/1976	-6.81	-40.9	13.58
NDOLA	ZM	-13	28.65	1331	3/15/1976	-7.6	-56.4	4.4
NDOLA	ZM	-13	28.65	1331	4/15/1976	-15.26	-110.7	11.38
NDOLA	ZM	-13	28.65	1331	12/15/1976	-5.08	-29.2	11.44
NDOLA	ZM	-13	28.65	1331	1/15/1978	-4.03	-35.4	-3.16
NDOLA	ZM	-13	28.65	1331	10/15/1978	1.01	16.8	8.72
NDOLA	ZM	-13	28.65	1331	12/15/1978	-10.51	-87.8	-3.72
NDOLA	ZM	-13	28.65	1331	10/15/1980	-2.06	-5.7	10.78
NDOLA	ZM	-13	28.65	1331	11/15/1980	-1.9	-5.3	9.9
NDOLA	ZM	-13	28.65	1331	12/15/1980	-6.24	-37.1	12.82
NDOLA	ZM	-13	28.65	1331	1/15/1981	-3.69	-12.4	17.12
NDOLA	ZM	-13	28.65	1331	2/15/1981	-5.7	-27.4	18.2
NDOLA	ZM	-13	28.65	1331	3/15/1981	-6.62	-38.1	14.86
NDOLA	ZM	-13	28.65	1331	4/15/1981	-4.67	-21.8	15.56
NDOLA	ZM	-13	28.65	1331	11/15/1981	-3.88	-20.2	10.84
NDOLA	ZM	-13	28.65	1331	1/15/1982	-6.16	-35.8	13.48
NDOLA	ZM	-13	28.65	1331	4/15/1982	-1.71	-3.9	9.78
NDOLA	ZM	-13	28.65	1331	5/15/1982	-2.33	-18.2	0.44
NDOLA	ZM	-13	28.65	1331	10/15/1982	-0.54	0.9	5.22
NDOLA	ZM	-13	28.65	1331	11/15/1982	-9.49	-66.2	9.72
NDOLA	ZM	-13	28.65	1331	12/15/1982	-8.03	-48.5	15.74
NDOLA	ZM	-13	28.65	1331	1/15/1983	-6.06	-30	18.48
NDOLA	ZM	-13	28.65	1331	2/15/1983	-7.58	-46.8	13.84
NDOLA	ZM	-13	28.65	1331	3/15/1983	-5.16	-26.6	14.68
NDOLA	ZM	-13	28.65	1331	4/15/1983	-3.97	-15.5	16.26
NDOLA	ZM	-13	28.65	1331	10/15/1983	-1.09	4	12.72
NDOLA	ZM	-13	28.65	1331	12/15/1983	-6.62	-36.7	16.26
NDOLA	ZM	-13	28.65	1331	1/15/1984	-6.37	-37.2	13.76
NDOLA	ZM	-13	28.65	1331	2/15/1984	-8.11	-53.8	11.08
NDOLA	ZM	-13	28.65	1331	3/15/1984	-6.2	-37.5	12.1
NDOLA	ZM	-13	28.65	1331	4/15/1984	-4.07	-24.3	8.26
NDOLA	ZM	-13	28.65	1331	10/15/1984	-1.21	-3.4	6.28
NDOLA	ZM	-13	28.65	1331	11/15/1984	-3.7	-23.1	6.5
NDOLA	ZM	-13	28.65	1331	12/15/1984	-6.91	-40.3	14.98
NDOLA	ZM	-13	28.65	1331	1/15/1985	-6.5	-40.9	11.1
NDOLA	ZM	-13	28.65	1331	2/15/1985	-6.99	-43.2	12.72
NDOLA	ZM	-13	28.65	1331	3/15/1985	-6.69	-41	12.52
NDOLA	ZM	-13	28.65	1331	4/15/1985	-7.42	-48.2	11.16
NDOLA	ZM	-13	28.65	1331	11/15/1988	-1.98	-3.3	12.54
NDOLA	ZM	-13	28.65	1331	12/15/1988	-4.71	-25.6	12.08
NDOLA	ZM	-13	28.65	1331	1/15/1989	-9.26	-63.8	10.28
NDOLA	ZM	-13	28.65	1331	2/15/1989	-4.37	-17.6	17.36
NDOLA	ZM	-13	28.65	1331	3/15/1989	-8.99	-60	11.92
NDOLA	ZM	-13	28.65	1331	4/15/1989	-2.15	-7.9	9.3
NDOLA	ZM	-13	28.65	1331	5/15/1989	-1.38	-6.6	4.44
NDOLA	ZM	-13	28.65	1331	11/15/1989	-4.03	-19.5	12.74
NDOLA	ZM	-13	28.65	1331	12/15/1989	-5.93	-31.6	15.84
NDOLA	ZM	-13	28.65	1331	1/15/1990	-3.96	-20.6	11.08
NDOLA	ZM	-13	28.65	1331	2/15/1990	-4.63	-20.8	16.24
NDOLA	ZM	-13	28.65	1331	3/15/1990	-2.71	-7.1	14.58
NDOLA	ZM	-13	28.65	1331	4/15/1990	-2.57	-9	11.56
NDOLA	ZM	-13	28.65	1331	5/15/1990	-3.53	-22	6.24
NDOLA	ZM	-13	28.65	1331	12/15/2001	-3.03	-9.6	14.64
NDOLA	ZM	-13	28.65	1331	1/15/2002	-7.08	-45.9	10.74
NDOLA	ZM	-13	28.65	1331	2/15/2002	-5.08	-31.5	9.14
NDOLA	ZM	-13	28.65	1331	3/15/2002	-5.62	-36.8	8.16
NDOLA	ZM	-13	28.65	1331	4/15/2002	-3.91	-20.3	10.98
NDOLA	ZM	-13	28.65	1331	10/15/2002	2.99	24.2	0.28
NDOLA	ZM	-13	28.65	1331	11/15/2002	-1.69	-3.5	10.02
NDOLA	ZM	-13	28.65	1331	12/15/2002	-7.99	-53.9	10.02
NDOLA	ZM	-13	28.65	1331	1/15/2004	-4.95	-30.3	9.3
NDOLA	ZM	-13	28.65	1331	2/15/2004	-6.5	-39.6	12.4
NDOLA	ZM	-13	28.65	1331	3/15/2004	-3.67	-15.5	13.86
NDOLA	ZM	-13	28.65	1331	4/15/2004	-6.13	-37	12.04
NDOLA	ZM	-13	28.65	1331	11/15/2004	-1.96	-3.72	11.96
NDOLA	ZM	-13	28.65	1331	12/15/2004	-7.18	-47.95	9.49
NDOLA	ZM	-13	28.65	1331	1/15/2003	-7.88	-49.6	13.44
NDOLA	ZM	-13	28.65	1331	2/15/2003	-3.61	-14.7	14.18
NDOLA	ZM	-13	28.65	1331	3/15/2003	-4.81	-23.2	15.28
NDOLA	ZM	-13	28.65	1331	4/15/2003	-7.13	-46.7	10.34
NDOLA	ZM	-13	28.65	1331	10/15/2003	-0.96	4.3	11.98
NDOLA	ZM	-13	28.65	1331	11/15/2003	-0.02	9.5	9.66
NDOLA	ZM	-13	28.65	1331	12/15/2003	-5.81	-36	10.48
NDOLA	ZM	-13	28.65	1331	1/15/2005	-6.58	-42.44	10.2
NDOLA	ZM	-13	28.65	1331	2/15/2005	-3.55	-16.36	12.04
NDOLA	ZM	-13	28.65	1331	3/15/2005	-5.84	-34.69	12.03
NDOLA	ZM	-13	28.65	1331	11/15/2005	0.72	9.85	4.09
NDOLA	ZM	-13	28.65	1331	12/15/2005	-2.23	-11.14	6.7
NDOLA	ZM	-13	28.65	1331	1/15/2006	-7.25	-46.19	11.81
NDOLA	ZM	-13	28.65	1331	2/15/2006	-6.14	-38.5	10.62
NDOLA	ZM	-13	28.65	1331	3/15/2006	-6.24	-41.28	8.64
NDOLA	ZM	-13	28.65	1331	10/15/2006	-9.22	-62.61	11.15
NDOLA	ZM	-13	28.65	1331	11/15/2006	-10.62	-74.73	10.23
NDOLA	ZM	-13	28.65	1331	12/15/2006	-5.55	-41.01	3.39
NDOLA	ZM	-13	28.65	1331	1/15/2007	-5.94	-35.62	11.9
NDOLA	ZM	-13	28.65	1331	2/15/2007	-5.93	-34.32	13.12
NDOLA	ZM	-13	28.65	1331	3/15/2007	-3.43	-16.74	10.7
NDOLA	ZM	-13	28.65	1331	4/15/2007	-3.46	-22	5.68
NDOLA	ZM	-13	28.65	1331	1/15/2009	-5.31	-27.91	14.57
NDOLA	ZM	-13	28.65	1331	2/15/2009	-8.83	-59.05	11.59
NDOLA	ZM	-13	28.65	1331	3/15/2009	-8.98	-58.7	13.14
NDOLA	ZM	-13	28.65	1331	4/15/2009	-5.84	-38.55	8.17
NDOLA	ZM	-13	28.65	1331	11/15/2009	-3.64	-23.25	5.87
NDOLA	ZM	-13	28.65	1331	12/15/2009	-6.81	-46.92	7.56
NDOLA	ZM	-13	28.65	1331	12/15/2007	-4.89	-30.46	8.66
NDOLA	ZM	-13	28.65	1331	1/15/2008	-7.62	-49.15	11.81
NDOLA	ZM	-13	28.65	1331	2/15/2008	-7.17	-52	5.36
NDOLA	ZM	-13	28.65	1331	3/15/2008	-6.55	-40.43	11.97
NDOLA	ZM	-13	28.65	1331	10/15/2008	-0.82	-8.76	-2.2
NDOLA	ZM	-13	28.65	1331	11/15/2008	-5.57	-36.85	7.71
NDOLA	ZM	-13	28.65	1331	12/15/2008	-5.38	-31.88	11.16
NDOLA	ZM	-13	28.65	1331	1/15/2010	-6.76004	-39.5138	14.5665
NDOLA	ZM	-13	28.65	1331	11/15/2010	-2.40049	-6.70073	12.5031
NDOLA	ZM	-13	28.65	1331	12/15/2010	-3.4184	-12.3895	14.9577
NDOLA	ZM	-13	28.65	1331	1/15/2011	-2.97613	-9.60832	14.2007
NDOLA	ZM	-13	28.65	1331	2/15/2011	-2.84222	-10.3555	12.3822
NDOLA	ZM	-13	28.65	1331	3/15/2011	-5.73204	-34.1251	11.7312
NDOLA	ZM	-13	28.65	1331	4/15/2011	-4.94514	-25.3891	14.172
NDOLA	ZM	-13	28.65	1331	1/15/2013	-6.97	-42.1	13.66
NDOLA	ZM	-13	28.65	1331	11/15/2013	0.06	4.1	3.62
NDOLA	ZM	-13	28.65	1331	12/15/2013	-4.53	-22.2	14.04
NDOLA	ZM	-13	28.65	1331	1/15/2014	-4.33	-19.6	15.04
NDOLA	ZM	-13	28.65	1331	2/15/2014	-5.78	-30.7	15.54
NDOLA	ZM	-13	28.65	1331	3/15/2014	-9.01	-61	11.08
NDOLA	ZM	-13	28.65	1331	11/15/2014	-1.33	0.7	11.34
NDOLA	ZM	-13	28.65	1331	1/15/2015	-3.82	-15.4	15.16
NDOLA	ZM	-13	28.65	1331	2/15/2015	-4.89	-28	11.12
NDOLA	ZM	-13	28.65	1331	3/15/2015	-2.51	-8.8	11.28
NDOLA	ZM	-13	28.65	1331	4/15/2015	-6.27	-33.9	16.26
NDOLA	ZM	-13	28.65	1331	1/15/2016	-7.05	-42	14.4
NDOLA	ZM	-13	28.65	1331	2/15/2016	-3.05	-9.1	15.3
NDOLA	ZM	-13	28.65	1331	3/15/2016	-5.9	-32.3	14.9
NDOLA	ZM	-13	28.65	1331	11/15/2016	-1.66	-5.2	8.08
NDOLA	ZM	-13	28.65	1331	12/15/2016	-3.01	-13.9	10.18
CHITENGO	MZ	-18.9752	34.3484	34	8/15/2010	-5	-31	9
CHITENGO	MZ	-18.9752	34.3484	34	9/15/2010	-5.79	-34.7	11.62
CHITENGO	MZ	-18.9752	34.3484	34	11/15/2010	-1.03	-2	6.24
CHITENGO	MZ	-18.9752	34.3484	34	3/15/2011	-7.18	-43	14.44
GORONGOSA	MZ	-18.6718	34.0724	346	9/15/2010	1.35	22.8	12
GORONGOSA	MZ	-18.6718	34.0724	346	11/15/2010	-0.19	3.4	4.92
GORONGOSA	MZ	-18.6718	34.0724	346	12/15/2010	-3.56	-14.8	13.68
GORONGOSA	MZ	-18.6718	34.0724	346	1/15/2011	-7.24	-47.7	10.22
GORONGOSA	MZ	-18.6718	34.0724	346	2/15/2011	-3.59	-13.4	15.32
GORONGOSA	MZ	-18.6718	34.0724	346	3/15/2011	-4.83	-24.5	14.14
GORONGOSA	MZ	-18.6718	34.0724	346	4/15/2011	-4.76	-25.4	12.68
GORONGOSA	MZ	-18.6718	34.0724	346	10/15/2011	-0.92	6.9	14.26
DAR ES SALAAM	TZ	-6.88	39.2	55	3/15/1961	-1.3	-0.6	9.8
DAR ES SALAAM	TZ	-6.88	39.2	55	4/15/1961	-1	-13.7	-5.7
DAR ES SALAAM	TZ	-6.88	39.2	55	5/15/1961	-2	6.2	22.2
DAR ES SALAAM	TZ	-6.88	39.2	55	6/15/1961	-0.1	2.5	3.3
DAR ES SALAAM	TZ	-6.88	39.2	55	7/15/1961	-4.1	-29.2	3.6
DAR ES SALAAM	TZ	-6.88	39.2	55	8/15/1961	-3.1	1.8	26.6
DAR ES SALAAM	TZ	-6.88	39.2	55	9/15/1961	-0.6	5.6	10.4
DAR ES SALAAM	TZ	-6.88	39.2	55	10/15/1961	-5.1	-28	12.8
DAR ES SALAAM	TZ	-6.88	39.2	55	12/15/1961	-6.6	-45.2	7.6
DAR ES SALAAM	TZ	-6.88	39.2	55	1/15/1962	-2.3	-3.1	15.3
DAR ES SALAAM	TZ	-6.88	39.2	55	2/15/1962	-3.5	-10.6	17.4
DAR ES SALAAM	TZ	-6.88	39.2	55	3/15/1962	-1.7	6.8	20.4
DAR ES SALAAM	TZ	-6.88	39.2	55	4/15/1962	-3.6	-5.6	23.2
DAR ES SALAAM	TZ	-6.88	39.2	55	5/15/1962	-2.4	-3.8	15.4
DAR ES SALAAM	TZ	-6.88	39.2	55	6/15/1962	-0.2	4.4	6
DAR ES SALAAM	TZ	-6.88	39.2	55	7/15/1962	-0.4	1.2	4.4
DAR ES SALAAM	TZ	-6.88	39.2	55	8/15/1962	-1.2	-4.4	5.2
DAR ES SALAAM	TZ	-6.88	39.2	55	10/15/1962	-0.8	-4.4	2
DAR ES SALAAM	TZ	-6.88	39.2	55	11/15/1962	-0.7	-1.9	3.7
DAR ES SALAAM	TZ	-6.88	39.2	55	12/15/1962	-1.6	-6.9	5.9
DAR ES SALAAM	TZ	-6.88	39.2	55	1/15/1963	-0.4	-3.1	0.1
DAR ES SALAAM	TZ	-6.88	39.2	55	2/15/1963	-2	-5.3	10.7
DAR ES SALAAM	TZ	-6.88	39.2	55	3/15/1963	-2.7	-16.8	4.8
DAR ES SALAAM	TZ	-6.88	39.2	55	4/15/1963	-4.4	-19.9	15.3
DAR ES SALAAM	TZ	-6.88	39.2	55	5/15/1963	-1.1	-0.6	8.2
DAR ES SALAAM	TZ	-6.88	39.2	55	6/15/1963	-4.4	-25.5	9.7
DAR ES SALAAM	TZ	-6.88	39.2	55	7/15/1963	-0.6	5.6	10.4
DAR ES SALAAM	TZ	-6.88	39.2	55	8/15/1963	1.3	15.6	5.2
DAR ES SALAAM	TZ	-6.88	39.2	55	10/15/1963	-0.3	4.4	6.8
DAR ES SALAAM	TZ	-6.88	39.2	55	11/15/1963	-4.9	-37.2	2
DAR ES SALAAM	TZ	-6.88	39.2	55	12/15/1963	-1.3	-6.9	3.5
DAR ES SALAAM	TZ	-6.88	39.2	55	1/15/1964	-1.3	-8.1	2.3
DAR ES SALAAM	TZ	-6.88	39.2	55	2/15/1964	-3.1	-20.5	4.3
DAR ES SALAAM	TZ	-6.88	39.2	55	3/15/1964	-2.9	-18.6	4.6
DAR ES SALAAM	TZ	-6.88	39.2	55	5/15/1964	-2.9	-14.9	8.3
DAR ES SALAAM	TZ	-6.88	39.2	55	9/15/1964	1.1	18.7	9.9
DAR ES SALAAM	TZ	-6.88	39.2	55	10/15/1964	-1.3	-4.4	6
DAR ES SALAAM	TZ	-6.88	39.2	55	12/15/1964	-0.9	-3.8	3.4
DAR ES SALAAM	TZ	-6.88	39.2	55	1/15/1965	-0.6	8.1	12.9
DAR ES SALAAM	TZ	-6.88	39.2	55	2/15/1965	1.6	16.2	3.4
DAR ES SALAAM	TZ	-6.88	39.2	55	3/15/1965	-3.6	-16.8	12
DAR ES SALAAM	TZ	-6.88	39.2	55	4/15/1965	-4.3	-20.5	13.9
DAR ES SALAAM	TZ	-6.88	39.2	55	5/15/1965	-2.5	-11.2	8.8
DAR ES SALAAM	TZ	-6.88	39.2	55	6/15/1965	0.5	9.9	5.9
DAR ES SALAAM	TZ	-6.88	39.2	55	7/15/1965	2.6	18	-2.8
DAR ES SALAAM	TZ	-6.88	39.2	55	8/15/1965	-1	1.8	9.8
DAR ES SALAAM	TZ	-6.88	39.2	55	9/15/1965	-1	-0.6	7.4
DAR ES SALAAM	TZ	-6.88	39.2	55	10/15/1965	-0.7	8.7	14.3
DAR ES SALAAM	TZ	-6.88	39.2	55	11/15/1965	-3.7	-27.3	2.3
DAR ES SALAAM	TZ	-6.88	39.2	55	12/15/1965	-1.9	-5	10.2
DAR ES SALAAM	TZ	-6.88	39.2	55	1/15/1966	-4.2	-23.6	10
DAR ES SALAAM	TZ	-6.88	39.2	55	2/15/1966	-1.4	-6.9	4.3
DAR ES SALAAM	TZ	-6.88	39.2	55	3/15/1966	-3.8	-23.6	6.8
DAR ES SALAAM	TZ	-6.88	39.2	55	4/15/1966	-2.5	-10	10
DAR ES SALAAM	TZ	-6.88	39.2	55	5/15/1966	-1.8	-6.9	7.5
DAR ES SALAAM	TZ	-6.88	39.2	55	6/15/1966	-0.7	-0.6	5
DAR ES SALAAM	TZ	-6.88	39.2	55	7/15/1966	-0.3	-2.5	-0.1
DAR ES SALAAM	TZ	-6.88	39.2	55	8/15/1966	-1.5	-1.3	10.7
DAR ES SALAAM	TZ	-6.88	39.2	55	9/15/1966	-0.9	7.5	14.7
DAR ES SALAAM	TZ	-6.88	39.2	55	10/15/1966	0.4	13.1	9.9
DAR ES SALAAM	TZ	-6.88	39.2	55	12/15/1966	-1.3	1.8	12.2
DAR ES SALAAM	TZ	-6.88	39.2	55	1/15/1967	-2.49	-5.9	14.02
DAR ES SALAAM	TZ	-6.88	39.2	55	2/15/1967	-1.58	-3.9	8.74
DAR ES SALAAM	TZ	-6.88	39.2	55	3/15/1967	-1.87	-2.6	12.36
DAR ES SALAAM	TZ	-6.88	39.2	55	4/15/1967	-3.27	-14.5	11.66
DAR ES SALAAM	TZ	-6.88	39.2	55	5/15/1967	-1.99	-7.8	8.12
DAR ES SALAAM	TZ	-6.88	39.2	55	6/15/1967	-1.05	1.4	9.8
DAR ES SALAAM	TZ	-6.88	39.2	55	7/15/1967	-1.75	-6.5	7.5
DAR ES SALAAM	TZ	-6.88	39.2	55	8/15/1967	-0.99	3.4	11.32
DAR ES SALAAM	TZ	-6.88	39.2	55	9/15/1967	-1.76	-3.9	10.18
DAR ES SALAAM	TZ	-6.88	39.2	55	10/15/1967	-2.52	-11.8	8.36
DAR ES SALAAM	TZ	-6.88	39.2	55	11/15/1967	-2.79	-24.3	-1.98
DAR ES SALAAM	TZ	-6.88	39.2	55	12/15/1967	-2.76	-11.1	10.98
DAR ES SALAAM	TZ	-6.88	39.2	55	1/15/1968	0.96	10	2.32
DAR ES SALAAM	TZ	-6.88	39.2	55	2/15/1968	-3.85	-20.6	10.2
DAR ES SALAAM	TZ	-6.88	39.2	55	3/15/1968	-6.68	-37.3	16.14
DAR ES SALAAM	TZ	-6.88	39.2	55	4/15/1968	-4.94	-25.4	14.12
DAR ES SALAAM	TZ	-6.88	39.2	55	5/15/1968	-1.66	4	17.28
DAR ES SALAAM	TZ	-6.88	39.2	55	6/15/1968	-1.28	4.6	14.84
DAR ES SALAAM	TZ	-6.88	39.2	55	8/15/1968	-3.09	-13.4	11.32
DAR ES SALAAM	TZ	-6.88	39.2	55	9/15/1968	-2.72	-15.2	6.56
DAR ES SALAAM	TZ	-6.88	39.2	55	10/15/1968	-1.83	-10.4	4.24
DAR ES SALAAM	TZ	-6.88	39.2	55	11/15/1968	-1.78	-8	6.24
DAR ES SALAAM	TZ	-6.88	39.2	55	12/15/1968	-3.29	-17	9.32
DAR ES SALAAM	TZ	-6.88	39.2	55	1/15/1969	-3.52	-22.4	5.76
DAR ES SALAAM	TZ	-6.88	39.2	55	2/15/1969	-2.99	-17.7	6.22
DAR ES SALAAM	TZ	-6.88	39.2	55	3/15/1969	-2.34	-10.6	8.12
DAR ES SALAAM	TZ	-6.88	39.2	55	4/15/1969	-2.67	-17.7	3.66
DAR ES SALAAM	TZ	-6.88	39.2	55	5/15/1969	-3.61	-16.3	12.58
DAR ES SALAAM	TZ	-6.88	39.2	55	6/15/1969	-1.01	-0.9	7.18
DAR ES SALAAM	TZ	-6.88	39.2	55	7/15/1969	-0.16	6.2	7.48
DAR ES SALAAM	TZ	-6.88	39.2	55	8/15/1969	-3.12	-13.1	11.86
DAR ES SALAAM	TZ	-6.88	39.2	55	9/15/1969	0.32	8.1	5.54
DAR ES SALAAM	TZ	-6.88	39.2	55	10/15/1969	-1.66	-0.2	13.08
DAR ES SALAAM	TZ	-6.88	39.2	55	11/15/1969	-1.37	-2.1	8.86
DAR ES SALAAM	TZ	-6.88	39.2	55	12/15/1969	-8.95	-62.6	9
DAR ES SALAAM	TZ	-6.88	39.2	55	1/15/1970	-1.72	-10	3.76
DAR ES SALAAM	TZ	-6.88	39.2	55	2/15/1970	-1.59	1.7	14.42
DAR ES SALAAM	TZ	-6.88	39.2	55	3/15/1970	-2.39	-9.3	9.82
DAR ES SALAAM	TZ	-6.88	39.2	55	4/15/1970	-3.48	-22.2	5.64
DAR ES SALAAM	TZ	-6.88	39.2	55	5/15/1970	-1.78	-13	1.24
DAR ES SALAAM	TZ	-6.88	39.2	55	6/15/1970	-0.63	3.5	8.54
DAR ES SALAAM	TZ	-6.88	39.2	55	9/15/1970	-0.5	-0.7	3.3
DAR ES SALAAM	TZ	-6.88	39.2	55	10/15/1970	-0.66	-1.7	3.58
DAR ES SALAAM	TZ	-6.88	39.2	55	11/15/1970	-2.61	-10.6	10.28
DAR ES SALAAM	TZ	-6.88	39.2	55	12/15/1970	-2.48	-20.7	-0.86
DAR ES SALAAM	TZ	-6.88	39.2	55	5/15/1972	-2.73	-6.7	15.14
DAR ES SALAAM	TZ	-6.88	39.2	55	8/15/1972	-0.98	3.8	11.64
DAR ES SALAAM	TZ	-6.88	39.2	55	10/15/1972	-1.9	-1.9	13.3
DAR ES SALAAM	TZ	-6.88	39.2	55	11/15/1972	-2.08	-5.9	10.74
DAR ES SALAAM	TZ	-6.88	39.2	55	12/15/1972	-3.96	-16.8	14.88
DAR ES SALAAM	TZ	-6.88	39.2	55	1/15/1973	-2.77	-11.2	10.96
DAR ES SALAAM	TZ	-6.88	39.2	55	2/15/1973	-0.8	4.8	11.2
DAR ES SALAAM	TZ	-6.88	39.2	55	3/15/1973	-3.04	-9.9	14.42
DAR ES SALAAM	TZ	-6.88	39.2	55	4/15/1973	-3.98	-19.1	12.74
DAR ES SALAAM	TZ	-6.88	39.2	55	9/15/1973	-1.26	3.2	13.28
DAR ES SALAAM	TZ	-6.88	39.2	55	10/15/1973	-1.26	4.4	14.48
DODOMA	TZ	-6.18527	35.7533	1157	1/15/1993	-5.88	-33.8	13.24
DODOMA	TZ	-6.18527	35.7533	1157	2/15/1993	0.06	11.7	11.22
DODOMA	TZ	-6.18527	35.7533	1157	3/15/1993	-3.61	-11	17.88
DODOMA	TZ	-6.18527	35.7533	1157	1/15/2014	-0.95	3.2	10.8
DODOMA	TZ	-6.18527	35.7533	1157	2/15/2014	-0.8	0.6	7
DODOMA	TZ	-6.18527	35.7533	1157	11/15/2014	-4.26	-20.4	13.68
DODOMA	TZ	-6.18527	35.7533	1157	12/15/2014	-0.66	3.2	8.48
DODOMA	TZ	-6.18527	35.7533	1157	1/15/2015	3.36	36.4	9.52
DODOMA	TZ	-6.18527	35.7533	1157	2/15/2015	-1.28	-2.3	7.94
DODOMA	TZ	-6.18527	35.7533	1157	3/15/2015	-0.68	1.5	6.94
DODOMA	TZ	-6.18527	35.7533	1157	4/15/2015	-1.15	-1.5	7.7
DODOMA	TZ	-6.18527	35.7533	1157	5/15/2015	-3.48	-17.4	10.44
DODOMA	TZ	-6.18527	35.7533	1157	11/15/2015	-2.58	-8.1	12.54
DODOMA	TZ	-6.18527	35.7533	1157	12/15/2015	-4.49	-21.5	14.42
DODOMA	TZ	-6.18527	35.7533	1157	1/15/2016	-5.12	-25.3	15.66
DODOMA	TZ	-6.18527	35.7533	1157	2/15/2016	-1.25	10.5	20.5
DODOMA	TZ	-6.18527	35.7533	1157	3/15/2016	-5.43	-31.3	12.14
DODOMA	TZ	-6.18527	35.7533	1157	4/15/2016	-10.15	-69.6	11.6
HARARE	ZW	-17.83	31.02	1471	1960-11-15	-0.4	8.7	11.9
HARARE	ZW	-17.83	31.02	1471	1961-01-15	-7	-42.8	13.2
HARARE	ZW	-17.83	31.02	1471	1961-02-15	-6.4	-41	10.2
HARARE	ZW	-17.83	31.02	1471	1961-03-15	-2.7	-13	8.6
HARARE	ZW	-17.83	31.02	1471	1961-04-15	-5.6	-29.2	15.6
HARARE	ZW	-17.83	31.02	1471	1961-05-15	3.9	34.2	3
HARARE	ZW	-17.83	31.02	1471	1961-06-15	0.4	11.2	8
HARARE	ZW	-17.83	31.02	1471	1961-07-15	-2.7	-7.5	14.1
HARARE	ZW	-17.83	31.02	1471	1961-08-15	-3.7	-20.5	9.1
HARARE	ZW	-17.83	31.02	1471	1961-10-15	-4.2	-21.1	12.5
HARARE	ZW	-17.83	31.02	1471	1961-11-15	-1	-5.6	2.4
HARARE	ZW	-17.83	31.02	1471	1962-01-15	-9.6	-63.2	13.6
HARARE	ZW	-17.83	31.02	1471	1962-02-15	-5.5	-31.6	12.4
HARARE	ZW	-17.83	31.02	1471	1962-03-15	-4.5	-20.5	15.5
HARARE	ZW	-17.83	31.02	1471	1962-04-15	-0.6	-5.6	-0.8
HARARE	ZW	-17.83	31.02	1471	1962-08-15	4.5	34.2	-1.8
HARARE	ZW	-17.83	31.02	1471	1962-10-15	2.8	24.8	2.4
HARARE	ZW	-17.83	31.02	1471	1962-11-15	-3.4	-13.7	13.5
HARARE	ZW	-17.83	31.02	1471	1963-01-15	-9.4	-66.4	8.8
HARARE	ZW	-17.83	31.02	1471	1963-02-15	-11	-84.2	3.8
HARARE	ZW	-17.83	31.02	1471	1963-03-15	-4.5	-29.2	6.8
HARARE	ZW	-17.83	31.02	1471	1963-04-15	-3.7	-12.4	17.2
HARARE	ZW	-17.83	31.02	1471	1963-10-15	-3.5	-12.4	15.6
HARARE	ZW	-17.83	31.02	1471	1963-11-15	-0.7	-1.3	4.3
HARARE	ZW	-17.83	31.02	1471	1964-01-15	-8.6	-62	6.8
HARARE	ZW	-17.83	31.02	1471	1964-02-15	-8	-55.1	8.9
HARARE	ZW	-17.83	31.02	1471	1964-03-15	-1.4	-10	1.2
HARARE	ZW	-17.83	31.02	1471	1964-04-15	0.4	-6.2	-9.4
HARARE	ZW	-17.83	31.02	1471	1964-05-15	-0.7	1.2	6.8
HARARE	ZW	-17.83	31.02	1471	1964-08-15	0.2	1.8	0.2
HARARE	ZW	-17.83	31.02	1471	1964-10-15	1.8	20.5	6.1
HARARE	ZW	-17.83	31.02	1471	1964-11-15	-3.9	-18	13.2
HARARE	ZW	-17.83	31.02	1471	1964-12-15	-7.4	-41	18.2
HARARE	ZW	-17.83	31.02	1471	1965-01-15	-6.9	-41.6	13.6
HARARE	ZW	-17.83	31.02	1471	1965-02-15	-2	-6.9	9.1
HARARE	ZW	-17.83	31.02	1471	1965-03-15	-4.7	-31	6.6
HARARE	ZW	-17.83	31.02	1471	1965-09-15	0.84	19.3	12.58
HARARE	ZW	-17.83	31.02	1471	1965-10-15	-0.53	6.7	10.94
HARARE	ZW	-17.83	31.02	1471	1965-11-15	-3.9	-9.1	22.1
HARARE	ZW	-17.83	31.02	1471	1966-01-15	-5.2	-31.6	10
HARARE	ZW	-17.83	31.02	1471	1966-02-15	-7.81	-45.5	16.98
HARARE	ZW	-17.83	31.02	1471	1966-03-15	-4.62	-28.3	8.66
HARARE	ZW	-17.83	31.02	1471	1966-04-15	-2.97	-1.9	21.86
HARARE	ZW	-17.83	31.02	1471	1966-05-15	-3.18	-4.6	20.84
HARARE	ZW	-17.83	31.02	1471	1966-06-15	0.6	24.5	19.7
HARARE	ZW	-17.83	31.02	1471	1966-08-15	-1.75	-0.6	13.4
HARARE	ZW	-17.83	31.02	1471	1966-09-15	0.04	16.6	16.28
HARARE	ZW	-17.83	31.02	1471	1966-11-15	0.33	19.2	16.56
HARARE	ZW	-17.83	31.02	1471	1966-12-15	-7.13	-42.1	14.94
HARARE	ZW	-17.83	31.02	1471	1967-01-15	-5.66	-30.3	14.98
HARARE	ZW	-17.83	31.02	1471	1967-02-15	-6.26	-29.6	20.48
HARARE	ZW	-17.83	31.02	1471	1967-03-15	-7.63	-34.2	26.84
HARARE	ZW	-17.83	31.02	1471	1967-04-15	-1.37	3.4	14.36
HARARE	ZW	-17.83	31.02	1471	1967-05-15	0.11	12.6	11.72
HARARE	ZW	-17.83	31.02	1471	1967-06-15	-0.94	9.3	16.82
HARARE	ZW	-17.83	31.02	1471	1967-08-15	-0.57	10.6	15.16
HARARE	ZW	-17.83	31.02	1471	1967-09-15	2.17	17.3	-0.06
HARARE	ZW	-17.83	31.02	1471	1967-10-15	-0.72	7.4	13.16
HARARE	ZW	-17.83	31.02	1471	1967-11-15	-1.91	4.7	19.98
HARARE	ZW	-17.83	31.02	1471	1967-12-15	-3.53	-12.5	15.74
HARARE	ZW	-17.83	31.02	1471	1968-06-15	-2.14	-10	7.12
HARARE	ZW	-17.83	31.02	1471	1968-08-15	-0.45	2.1	5.7
HARARE	ZW	-17.83	31.02	1471	1968-10-15	4.41	18	-17.28
HARARE	ZW	-17.83	31.02	1471	1968-11-15	-5.76	-32.2	13.88
HARARE	ZW	-17.83	31.02	1471	1968-12-15	-10.2	-66.9	14.7
HARARE	ZW	-17.83	31.02	1471	1970-03-15	-0.03	7	7.24
HARARE	ZW	-17.83	31.02	1471	1970-04-15	-3.63	-12	17.04
HARARE	ZW	-17.83	31.02	1471	1970-09-15	-0.8	7	13.4
HARARE	ZW	-17.83	31.02	1471	1970-10-15	0.66	15	9.72
HARARE	ZW	-17.83	31.02	1471	1970-11-15	-7.11	-40	16.88
HARARE	ZW	-17.83	31.02	1471	1970-12-15	-5.28	-27	15.24
HARARE	ZW	-17.83	31.02	1471	1971-01-15	-7.09	-42	14.72
HARARE	ZW	-17.83	31.02	1471	1971-02-15	-3.97	-17	14.76
HARARE	ZW	-17.83	31.02	1471	1971-03-15	-2.07	-4	12.56
HARARE	ZW	-17.83	31.02	1471	1971-04-15	-4.12	-20	12.96
HARARE	ZW	-17.83	31.02	1471	1971-05-15	-3.25	-10	16
HARARE	ZW	-17.83	31.02	1471	1971-06-15	-1.14	2	11.12
HARARE	ZW	-17.83	31.02	1471	1971-09-15	1.19	22	12.48
HARARE	ZW	-17.83	31.02	1471	1971-10-15	-0.58	12	16.64
HARARE	ZW	-17.83	31.02	1471	1971-11-15	-6.74	-36	17.92
HARARE	ZW	-17.83	31.02	1471	1971-12-15	-4.11	-18	14.88
HARARE	ZW	-17.83	31.02	1471	1972-01-15	-8.41	-52.2	15.08
HARARE	ZW	-17.83	31.02	1471	1972-02-15	-14.36	-101.4	13.48
HARARE	ZW	-17.83	31.02	1471	1972-03-15	-4.69	-24.1	13.42
HARARE	ZW	-17.83	31.02	1471	1972-04-15	-3.9	-17.5	13.7
HARARE	ZW	-17.83	31.02	1471	1972-05-15	-3.64	-13.6	15.52
HARARE	ZW	-17.83	31.02	1471	1972-07-15	-1.98	8.7	24.54
HARARE	ZW	-17.83	31.02	1471	1972-09-15	1.5	19.4	7.4
HARARE	ZW	-17.83	31.02	1471	1972-12-15	-4.15	-27.5	5.7
HARARE	ZW	-17.83	31.02	1471	1973-02-15	-3.5	-16	12
HARARE	ZW	-17.83	31.02	1471	1973-04-15	-4.9	-20.4	18.8
HARARE	ZW	-17.83	31.02	1471	1973-05-15	-2.07	18	34.56
HARARE	ZW	-17.83	31.02	1471	1973-07-15	3.02	21.5	-2.66
HARARE	ZW	-17.83	31.02	1471	1973-10-15	-3.56	-7.4	21.08
HARARE	ZW	-17.83	31.02	1471	1973-11-15	-6.95	-34.9	20.7
HARARE	ZW	-17.83	31.02	1471	1973-12-15	-8	-42.9	21.1
HARARE	ZW	-17.83	31.02	1471	1974-01-15	-7.68	-41	20.44
HARARE	ZW	-17.83	31.02	1471	1974-02-15	-8.96	-43.2	28.48
HARARE	ZW	-17.83	31.02	1471	1974-03-15	-9.29	-50.6	23.72
HARARE	ZW	-17.83	31.02	1471	1974-04-15	-7.37	-31	27.96
HARARE	ZW	-17.83	31.02	1471	1974-05-15	-6.98	-26.5	29.34
HARARE	ZW	-17.83	31.02	1471	1975-01-15	-4.61	-21.5	15.38
HARARE	ZW	-17.83	31.02	1471	1975-03-15	-6.57	-46.3	6.26
HARARE	ZW	-17.83	31.02	1471	1975-04-15	-1.68	-4.6	8.84
HARARE	ZW	-17.83	31.02	1471	1975-10-15	-0.05	11.7	12.1
HARARE	ZW	-17.83	31.02	1471	1989-10-15	-2.51	-4.7	15.38
HARARE	ZW	-17.83	31.02	1471	1989-11-15	-2.64	-5.2	15.92
HARARE	ZW	-17.83	31.02	1471	1989-12-15	-5.35	-33.3	9.5
HARARE	ZW	-17.83	31.02	1471	1990-01-15	-4.06	-21.5	10.98
HARARE	ZW	-17.83	31.02	1471	1990-02-15	-6.06	-33.1	15.38
HARARE	ZW	-17.83	31.02	1471	1990-03-15	-3.5	-9.9	18.1
HARARE	ZW	-17.83	31.02	1471	1990-04-15	-1.98	-0.3	15.54
HARARE	ZW	-17.83	31.02	1471	1990-11-15	-5.29	-31.8	10.52
HARARE	ZW	-17.83	31.02	1471	1990-12-15	-3.2	-10.6	15
HARARE	ZW	-17.83	31.02	1471	1991-01-15	-6.29	-38.9	11.42
HARARE	ZW	-17.83	31.02	1471	1991-02-15	-5.43	-26.3	17.14
HARARE	ZW	-17.83	31.02	1471	1991-03-15	-6.95	-45.4	10.2
HARARE	ZW	-17.83	31.02	1471	1991-11-15	-0.99	4.4	12.32
HARARE	ZW	-17.83	31.02	1471	1991-12-15	-3.33	-8.5	18.14
HARARE	ZW	-17.83	31.02	1471	1992-01-15	-5.35	-26.9	15.9
HARARE	ZW	-17.83	31.02	1471	1992-02-15	-1.32	-0.2	10.36
HARARE	ZW	-17.83	31.02	1471	1992-03-15	-1.5	-2.1	9.9
HARARE	ZW	-17.83	31.02	1471	1992-04-15	-3.34	-7.8	18.92
HARARE	ZW	-17.83	31.02	1471	1992-12-15	-8.82	-57.1	13.46
HARARE	ZW	-17.83	31.02	1471	1993-01-15	-5.36	-31.5	11.38
HARARE	ZW	-17.83	31.02	1471	1993-02-15	-5.93	-35.7	11.74
HARARE	ZW	-17.83	31.02	1471	1993-03-15	-2.94	-9.1	14.42
HARARE	ZW	-17.83	31.02	1471	1993-04-15	-1.8	-0.7	13.7
HARARE	ZW	-17.83	31.02	1471	1993-11-15	-2.39	-11.2	7.92
HARARE	ZW	-17.83	31.02	1471	1993-12-15	-1.1	3.1	11.9
HARARE	ZW	-17.83	31.02	1471	1994-01-15	-3.97	-19.8	11.96
HARARE	ZW	-17.83	31.02	1471	1994-02-15	-3.92	-17.2	14.16
HARARE	ZW	-17.83	31.02	1471	1994-03-15	-1.12	1.5	10.46
HARARE	ZW	-17.83	31.02	1471	1994-10-15	-1.66	1.2	14.48
HARARE	ZW	-17.83	31.02	1471	1994-11-15	-0.51	6.3	10.38
HARARE	ZW	-17.83	31.02	1471	1994-12-15	-6.66	-44.4	8.88
HARARE	ZW	-17.83	31.02	1471	1995-01-15	-7.42	-44.4	14.96
HARARE	ZW	-17.83	31.02	1471	1995-02-15	-1.4	2.2	13.4
HARARE	ZW	-17.83	31.02	1471	1995-11-15	0.445	8.6	5.04
HARARE	ZW	-17.83	31.02	1471	1995-12-15	-5.58	-30.4	14.24
HARARE	ZW	-17.83	31.02	1471	1996-01-15	-2.27	-3.6	14.56
HARARE	ZW	-17.83	31.02	1471	1996-02-15	-7.1	-44.6	12.2
HARARE	ZW	-17.83	31.02	1471	1996-03-15	-7.31	-46.4	12.08
HARARE	ZW	-17.83	31.02	1471	1996-11-15	-0.37	10	12.96
HARARE	ZW	-17.83	31.02	1471	1996-12-15	-3.145	-11.4	13.76
HARARE	ZW	-17.83	31.02	1471	1997-01-15	-8.73	-58.2	11.64
HARARE	ZW	-17.83	31.02	1471	1997-02-15	-12.07	-84.4	12.16
HARARE	ZW	-17.83	31.02	1471	1997-03-15	-8.1	-51	13.8
HARARE	ZW	-17.83	31.02	1471	1997-11-15	-6.49	-39.6	12.32
HARARE	ZW	-17.83	31.02	1471	1997-12-15	-4.79	-27	11.32
HARARE	ZW	-17.83	31.02	1471	1998-01-15	-12.25	-86.3	11.7
HARARE	ZW	-17.83	31.02	1471	1998-02-15	-16.84	-122.1	12.62
HARARE	ZW	-17.83	31.02	1471	1998-03-15	-1.67	-2.2	11.16
HARARE	ZW	-17.83	31.02	1471	1998-11-15	-4.7	-23.1	14.5
HARARE	ZW	-17.83	31.02	1471	1998-12-15	-5.57	-29.5	15.06
HARARE	ZW	-17.83	31.02	1471	1999-01-15	-9.06	-62	10.48
HARARE	ZW	-17.83	31.02	1471	1999-02-15	-10.19	-69.45	12.07
HARARE	ZW	-17.83	31.02	1471	1999-03-15	-4.46	-22.25	13.43
HARARE	ZW	-17.83	31.02	1471	1999-10-15	0.58	14.8	10.16
HARARE	ZW	-17.83	31.02	1471	1999-11-15	-2.515	-11.65	8.47
HARARE	ZW	-17.83	31.02	1471	1999-12-15	-3.27	-15.75	10.41
HARARE	ZW	-17.83	31.02	1471	2000-01-15	-6.71	-39.2	14.48
HARARE	ZW	-17.83	31.02	1471	2000-02-15	-9.52	-64.95	11.21
HARARE	ZW	-17.83	31.02	1471	2000-03-15	-6.95	-43.85	11.75
HARARE	ZW	-17.83	31.02	1471	2000-04-15	-2.69	-6.45	15.07
HARARE	ZW	-17.83	31.02	1471	2000-05-15	-4.23	-14.6	19.24
HARARE	ZW	-17.83	31.02	1471	2000-10-15	-5.02	-29.2	10.96
HARARE	ZW	-17.83	31.02	1471	2000-11-15	-4.12	-20.6	12.36
HARARE	ZW	-17.83	31.02	1471	2000-12-15	-8.39	-53.85	13.27
HARARE	ZW	-17.83	31.02	1471	2001-01-15	-5.37	-31.3	11.66
HARARE	ZW	-17.83	31.02	1471	2001-02-15	-8.82	-58.4	12.16
HARARE	ZW	-17.83	31.02	1471	2001-03-15	-3.73	-15.1	14.74
HARARE	ZW	-17.83	31.02	1471	2001-10-15	3.68	16.2	-13.24
HARARE	ZW	-17.83	31.02	1471	2001-11-15	-0.91	5.6	12.88
HARARE	ZW	-17.83	31.02	1471	2001-12-15	-4.01	-16.8	15.28
HARARE	ZW	-17.83	31.02	1471	2002-01-15	-3.46	-13.45	14.23
HARARE	ZW	-17.83	31.02	1471	2002-02-15	-0.98	5.9	13.74
HARARE	ZW	-17.83	31.02	1471	2002-03-15	-3.43	-15.4	12.04
HARARE	ZW	-17.83	31.02	1471	2002-04-15	-6.4	-37.1	14.1
HARARE	ZW	-17.83	31.02	1471	2002-06-15	-2.82	-0.2	22.36
HARARE	ZW	-17.83	31.02	1471	2002-10-15	-2.69	-9.75	11.77
HARARE	ZW	-17.83	31.02	1471	2002-11-15	-3.98	-16.5	15.34
HARARE	ZW	-17.83	31.02	1471	2002-12-15	-3.07	-11.3	13.26
HARARE	ZW	-17.83	31.02	1471	2003-01-15	-6.05	-34.1	14.3
HARARE	ZW	-17.83	31.02	1471	2003-02-15	-4.17	-18.4	14.96
HARARE	ZW	-17.83	31.02	1471	2003-03-15	-8.28	-54.1	12.14
HARARE	ZW	-17.83	31.02	1471	2003-11-15	-1.82	-1.71	12.85
HARARE	ZW	-17.83	31.02	1471	2003-12-15	-6.68	-40.68	12.76
Central Water Laboratory	MW	-13.9711	33.7686	1046	2016-04-01	-1.4	3.75	14.95
Central Water Laboratory	MW	-13.9711	33.7686	1046	2015-04-01	-0.29	8.4	10.72
Central Water Laboratory	MW	-13.9711	33.7686	1046	2016-12-01	-8.71	-56	13.68
Central Water Laboratory	MW	-13.9711	33.7686	1046	2017-12-31	-7.63	-47.6	13.44
Central Water Laboratory	MW	-13.9711	33.7686	1046	2018-12-31	-5.975	-32.5	15.3
Central Water Laboratory	MW	-13.9711	33.7686	1046	2015-12-01	-5.33	-24	18.64
Central Water Laboratory	MW	-13.9711	33.7686	1046	2015-02-23	-6.83	-51.5	3.14
Central Water Laboratory	MW	-13.9711	33.7686	1046	2018-02-26	-7.53	-44.4	15.84
Central Water Laboratory	MW	-13.9711	33.7686	1046	2014-02-15	-6.95	-42.3	13.3
Central Water Laboratory	MW	-13.9711	33.7686	1046	2019-02-14	-6.64	-38.1	15.02
Central Water Laboratory	MW	-13.9711	33.7686	1046	2019-01-07	-8.24	-50.7	15.22
Central Water Laboratory	MW	-13.9711	33.7686	1046	2016-01-01	-4.71	-20.3	17.38
Central Water Laboratory	MW	-13.9711	33.7686	1046	2016-03-01	-5.97	-30.8	16.96
Central Water Laboratory	MW	-13.9711	33.7686	1046	2018-03-31	-4.8	-24.2	14.2
Central Water Laboratory	MW	-13.9711	33.7686	1046	2015-12-01	-8.71	-56	13.68
Central Water Laboratory	MW	-13.9711	33.7686	1046	2016-02-01	-5.33	-24	18.64
Central Water Laboratory	MW	-13.9711	33.7686	1046	2017-11-29	-7.49	-44.3	15.62
Central Water Laboratory	MW	-13.9711	33.7686	1046	2018-11-04	-6.56	-37.9	14.58
CR Collection Point	MW	-16.1392	35.6306	1127	2018-12-01	-9.59	-66.8	9.92
CR Collection Point	MW	-16.1392	35.6306	1127	2019-01-01	-10.27	-68.41	13.75
CR Collection Point	MW	-16.1392	35.6306	1127	2019-02-01	-6.133	-34.6	14.464
CR Collection Point	MW	-16.1392	35.6306	1127	2019-03-01	-8.789	-58.9	11.412
CR Collection Point	MW	-16.1392	35.6306	1127	2019-04-01	-2.75	-4.3	17.7
Mzuni Met Service Station	MW	-11.4152	33.9953	1287	2017-12-20	-8.965	-57.85	13.87
Mzuni Met Service Station	MW	-11.4152	33.9953	1287	2019-02-10	-7.43	-47	12.44
Mzuni Met Service Station	MW	-11.4152	33.9953	1287	2018-02-14	-3.71	-14.73	14.95
Mzuni Met Service Station	MW	-11.4152	33.9953	1287	2019-02-11	-2.22	-19.4	-1.64
Mzuni Met Service Station	MW	-11.4152	33.9953	1287	2018-01-10	-7.016	-42.24	13.888
Mzuni Met Service Station	MW	-11.4152	33.9953	1287	2019-03-07	-6.58	-36.2	16.44
Ngabu Met Service Station	MW	-16.5303	34.8912	80	2018-12-28	-6.22	-37.65	12.11
Ngabu Met Service Station	MW	-16.5303	34.8912	80	2019-02-15	-7.58	-48.4	12.24
Ngabu Met Service Station	MW	-16.5303	34.8912	80	2019-01-11	-6.815	-47.1	7.42
Ngabu Met Service Station	MW	-16.5303	34.8912	80	2018-11-23	-3.75	-18.55	11.45
Ngabu Meteorological Station	MW	-16.5303	34.8912	80	2017-12-29	-8.915	-57.65	13.67
Ngabu Meteorological Station	MW	-16.5303	34.8912	80	2018-02-09	-4.195	-24.7	8.86
Ngabu Meteorological Station	MW	-16.5303	34.8912	80	2018-01-19	-2.51	-6	14.08
Salima Meteorological Station	MW	-13.754	34.5844	513	2018-12-22	-7.63	-48.1	12.94
Salima Meteorological Station	MW	-13.754	34.5844	513	2017-12-29	-4.943	-25.1	14.444
Salima Meteorological Station	MW	-13.754	34.5844	513	2018-02-02	-7.26	-44.45	13.63
Salima Meteorological Station	MW	-13.754	34.5844	513	2018-01-12	-3.5833	-13.4666	15.1998

## Sheet: Dataset II
Site	Country	Latitude	Longitude	Altitude	Date	O18	H2	D excess	Precipitation
NDOLA	ZM	-13	28.65	1331	11/15/1968	-2.3	-10.6	7.8	82
NDOLA	ZM	-13	28.65	1331	12/15/1968	-13.05	-97.4	7	454
NDOLA	ZM	-13	28.65	1331	1/15/1969	-8.07	-47.7	16.86	396
NDOLA	ZM	-13	28.65	1331	2/15/1969	-17.46	-121.2	18.48	373
NDOLA	ZM	-13	28.65	1331	3/15/1969	-10.87	-74.9	12.06	124
NDOLA	ZM	-13	28.65	1331	4/15/1969	-5.88	-34.1	12.94	73
NDOLA	ZM	-13	28.65	1331	10/15/1969	-8.24	-56.3	9.62	43
NDOLA	ZM	-13	28.65	1331	11/15/1969	-5.74	-40.6	5.32	80
NDOLA	ZM	-13	28.65	1331	12/15/1969	-7.24	-42.7	15.22	403
NDOLA	ZM	-13	28.65	1331	1/15/1970	-5.59	-34.1	10.62	385
NDOLA	ZM	-13	28.65	1331	2/15/1970	-7.18	-45	12.44	115
NDOLA	ZM	-13	28.65	1331	3/15/1970	-3.83	-21.8	8.84	98
NDOLA	ZM	-13	28.65	1331	4/15/1970	-6.07	-41.1	7.46	10
NDOLA	ZM	-13	28.65	1331	9/15/1970	-7.55	-43.6	16.8	4
NDOLA	ZM	-13	28.65	1331	10/15/1970	-0.9	3.1	10.3	38
NDOLA	ZM	-13	28.65	1331	11/15/1970	-5.4	-34.7	8.5	295
NDOLA	ZM	-13	28.65	1331	12/15/1970	-7.19	-45.9	11.62	360
NDOLA	ZM	-13	28.65	1331	1/15/1973	-11.74	-78.2	15.72	199
NDOLA	ZM	-13	28.65	1331	2/15/1973	-4.19	-21.6	11.92	269
NDOLA	ZM	-13	28.65	1331	3/15/1973	-4.15	-22.1	11.1	38
NDOLA	ZM	-13	28.65	1331	4/15/1973	-3.77	-22.7	7.46	18
NDOLA	ZM	-13	28.65	1331	11/15/1974	-3.64	-17.4	11.72	67
NDOLA	ZM	-13	28.65	1331	12/15/1974	-2.95	-11.3	12.3	419
NDOLA	ZM	-13	28.65	1331	1/15/1975	-0.51	2.3	6.38	204
NDOLA	ZM	-13	28.65	1331	2/15/1975	-2.64	-5.5	15.62	245
NDOLA	ZM	-13	28.65	1331	3/15/1975	-5.59	-28.9	15.82	243
NDOLA	ZM	-13	28.65	1331	4/15/1975	-3.93	-24.9	6.54	56
NDOLA	ZM	-13	28.65	1331	11/15/1975	-5.44	-29.1	14.42	57
NDOLA	ZM	-13	28.65	1331	12/15/1975	-5.21	-34.1	7.58	382
NDOLA	ZM	-13	28.65	1331	1/15/1976	-10.13	-65.3	15.74	175
NDOLA	ZM	-13	28.65	1331	2/15/1976	-6.81	-40.9	13.58	257
NDOLA	ZM	-13	28.65	1331	3/15/1976	-7.6	-56.4	4.4	181
NDOLA	ZM	-13	28.65	1331	4/15/1976	-15.26	-110.7	11.38	128
NDOLA	ZM	-13	28.65	1331	12/15/1976	-5.08	-29.2	11.44	219
NDOLA	ZM	-13	28.65	1331	1/15/1978	-4.03	-35.4	-3.16	326
NDOLA	ZM	-13	28.65	1331	10/15/1978	1.01	16.8	8.72	67
NDOLA	ZM	-13	28.65	1331	12/15/1978	-10.51	-87.8	-3.72	381
NDOLA	ZM	-13	28.65	1331	10/15/1980	-2.06	-5.7	10.78	93
NDOLA	ZM	-13	28.65	1331	11/15/1980	-1.9	-5.3	9.9	155
NDOLA	ZM	-13	28.65	1331	12/15/1980	-6.24	-37.1	12.82	320
NDOLA	ZM	-13	28.65	1331	1/15/1981	-3.69	-12.4	17.12	244
NDOLA	ZM	-13	28.65	1331	2/15/1981	-5.7	-27.4	18.2	306
NDOLA	ZM	-13	28.65	1331	3/15/1981	-6.62	-38.1	14.86	156
NDOLA	ZM	-13	28.65	1331	4/15/1981	-4.67	-21.8	15.56	100
NDOLA	ZM	-13	28.65	1331	11/15/1981	-3.88	-20.2	10.84	158
NDOLA	ZM	-13	28.65	1331	1/15/1982	-6.16	-35.8	13.48	273
NDOLA	ZM	-13	28.65	1331	4/15/1982	-1.71	-3.9	9.78	67
NDOLA	ZM	-13	28.65	1331	5/15/1982	-2.33	-18.2	0.44	18
NDOLA	ZM	-13	28.65	1331	10/15/1982	-0.54	0.9	5.22	27
NDOLA	ZM	-13	28.65	1331	11/15/1982	-9.49	-66.2	9.72	120
NDOLA	ZM	-13	28.65	1331	12/15/1982	-8.03	-48.5	15.74	238
NDOLA	ZM	-13	28.65	1331	1/15/1983	-6.06	-30	18.48	318
NDOLA	ZM	-13	28.65	1331	2/15/1983	-7.58	-46.8	13.84	143
NDOLA	ZM	-13	28.65	1331	3/15/1983	-5.16	-26.6	14.68	137
NDOLA	ZM	-13	28.65	1331	4/15/1983	-3.97	-15.5	16.26	98
NDOLA	ZM	-13	28.65	1331	10/15/1983	-1.09	4	12.72	81
NDOLA	ZM	-13	28.65	1331	12/15/1983	-6.62	-36.7	16.26	455
NDOLA	ZM	-13	28.65	1331	1/15/1984	-6.37	-37.2	13.76	205
NDOLA	ZM	-13	28.65	1331	2/15/1984	-8.11	-53.8	11.08	260
NDOLA	ZM	-13	28.65	1331	3/15/1984	-6.2	-37.5	12.1	149
NDOLA	ZM	-13	28.65	1331	4/15/1984	-4.07	-24.3	8.26	3
NDOLA	ZM	-13	28.65	1331	10/15/1984	-1.21	-3.4	6.28	39
NDOLA	ZM	-13	28.65	1331	11/15/1984	-3.7	-23.1	6.5	183
NDOLA	ZM	-13	28.65	1331	12/15/1984	-6.91	-40.3	14.98	451
NDOLA	ZM	-13	28.65	1331	1/15/1985	-6.5	-40.9	11.1	308
NDOLA	ZM	-13	28.65	1331	2/15/1985	-6.99	-43.2	12.72	269
NDOLA	ZM	-13	28.65	1331	3/15/1985	-6.69	-41	12.52	186
NDOLA	ZM	-13	28.65	1331	4/15/1985	-7.42	-48.2	11.16	65
NDOLA	ZM	-13	28.65	1331	11/15/1989	-4.03	-19.5	12.74	103
NDOLA	ZM	-13	28.65	1331	12/15/1989	-5.93	-31.6	15.84	294
NDOLA	ZM	-13	28.65	1331	1/15/1990	-3.96	-20.6	11.08	190
NDOLA	ZM	-13	28.65	1331	2/15/1990	-4.63	-20.8	16.24	260
NDOLA	ZM	-13	28.65	1331	3/15/1990	-2.71	-7.1	14.58	130
NDOLA	ZM	-13	28.65	1331	4/15/1990	-2.57	-9	11.56	101
NDOLA	ZM	-13	28.65	1331	5/15/1990	-3.53	-22	6.24	4
NDOLA	ZM	-13	28.65	1331	12/15/2001	-3.03	-9.6	14.64	342.6
NDOLA	ZM	-13	28.65	1331	1/15/2002	-7.08	-45.9	10.74	308.3
NDOLA	ZM	-13	28.65	1331	2/15/2002	-5.08	-31.5	9.14	203.3
NDOLA	ZM	-13	28.65	1331	3/15/2002	-5.62	-36.8	8.16	60.4
NDOLA	ZM	-13	28.65	1331	4/15/2002	-3.91	-20.3	10.98	30.5
NDOLA	ZM	-13	28.65	1331	10/15/2002	2.99	24.2	0.28	40.6
NDOLA	ZM	-13	28.65	1331	11/15/2002	-1.69	-3.5	10.02	149.6
NDOLA	ZM	-13	28.65	1331	12/15/2002	-7.99	-53.9	10.02	28
NDOLA	ZM	-13	28.65	1331	10/15/2003	-0.96	4.3	11.98	43.2
NDOLA	ZM	-13	28.65	1331	11/15/2003	-0.02	9.5	9.66	66
NDOLA	ZM	-13	28.65	1331	12/15/2003	-5.81	-36	10.48	262.7
NDOLA	ZM	-13	28.65	1331	11/15/2005	0.72	9.85	4.09	156.4
NDOLA	ZM	-13	28.65	1331	12/15/2005	-2.23	-11.14	6.7	259.2
NDOLA	ZM	-13	28.65	1331	1/15/2006	-7.25	-46.19	11.81	359.7
NDOLA	ZM	-13	28.65	1331	2/15/2006	-6.14	-38.5	10.62	266.5
NDOLA	ZM	-13	28.65	1331	3/15/2006	-6.24	-41.28	8.64	212.9
NDOLA	ZM	-13	28.65	1331	1/15/2007	-5.94	-35.62	11.9	420.4
NDOLA	ZM	-13	28.65	1331	2/15/2007	-5.93	-34.32	13.12	365.4
NDOLA	ZM	-13	28.65	1331	3/15/2007	-3.43	-16.74	10.7	94.3
NDOLA	ZM	-13	28.65	1331	4/15/2007	-3.46	-22	5.68	29.6
NDOLA	ZM	-13	28.65	1331	1/15/2013	-6.97	-42.1	13.66	310.4
NDOLA	ZM	-13	28.65	1331	11/15/2013	0.06	4.1	3.62	105.6
NDOLA	ZM	-13	28.65	1331	12/15/2013	-4.53	-22.2	14.04	301.6
NDOLA	ZM	-13	28.65	1331	1/15/2014	-4.33	-19.6	15.04	233.7
NDOLA	ZM	-13	28.65	1331	2/15/2014	-5.78	-30.7	15.54	384.4
NDOLA	ZM	-13	28.65	1331	3/15/2014	-9.01	-61	11.08	210.3
NDOLA	ZM	-13	28.65	1331	11/15/2014	-1.33	0.7	11.34	59.6
NDOLA	ZM	-13	28.65	1331	1/15/2015	-3.82	-15.4	15.16	466
NDOLA	ZM	-13	28.65	1331	2/15/2015	-4.89	-28	11.12	244.7
NDOLA	ZM	-13	28.65	1331	3/15/2015	-2.51	-8.8	11.28	117.7
NDOLA	ZM	-13	28.65	1331	4/15/2015	-6.27	-33.9	16.26	172.6
NDOLA	ZM	-13	28.65	1331	1/15/2016	-7.05	-42	14.4	345.4
NDOLA	ZM	-13	28.65	1331	2/15/2016	-3.05	-9.1	15.3	196.4
NDOLA	ZM	-13	28.65	1331	3/15/2016	-5.9	-32.3	14.9	184.4
NDOLA	ZM	-13	28.65	1331	11/15/2016	-1.66	-5.2	8.08	182.2
NDOLA	ZM	-13	28.65	1331	12/15/2016	-3.01	-13.9	10.18	160.8
DAR ES SALAAM	TZ	-6.88	39.2	55	3/15/1961	-1.3	-0.6	9.8	40
DAR ES SALAAM	TZ	-6.88	39.2	55	4/15/1961	-1	-13.7	-5.7	160
DAR ES SALAAM	TZ	-6.88	39.2	55	5/15/1961	-2	6.2	22.2	70
DAR ES SALAAM	TZ	-6.88	39.2	55	6/15/1961	-0.1	2.5	3.3	70
DAR ES SALAAM	TZ	-6.88	39.2	55	7/15/1961	-4.1	-29.2	3.6	160
DAR ES SALAAM	TZ	-6.88	39.2	55	8/15/1961	-3.1	1.8	26.6	20
DAR ES SALAAM	TZ	-6.88	39.2	55	9/15/1961	-0.6	5.6	10.4	22
DAR ES SALAAM	TZ	-6.88	39.2	55	10/15/1961	-5.1	-28	12.8	282
DAR ES SALAAM	TZ	-6.88	39.2	55	12/15/1961	-6.6	-45.2	7.6	304
DAR ES SALAAM	TZ	-6.88	39.2	55	1/15/1962	-2.3	-3.1	15.3	83
DAR ES SALAAM	TZ	-6.88	39.2	55	2/15/1962	-3.5	-10.6	17.4	47
DAR ES SALAAM	TZ	-6.88	39.2	55	3/15/1962	-1.7	6.8	20.4	154
DAR ES SALAAM	TZ	-6.88	39.2	55	4/15/1962	-3.6	-5.6	23.2	311
DAR ES SALAAM	TZ	-6.88	39.2	55	5/15/1962	-2.4	-3.8	15.4	54
DAR ES SALAAM	TZ	-6.88	39.2	55	6/15/1962	-0.2	4.4	6	8
DAR ES SALAAM	TZ	-6.88	39.2	55	7/15/1962	-0.4	1.2	4.4	17
DAR ES SALAAM	TZ	-6.88	39.2	55	8/15/1962	-1.2	-4.4	5.2	95
DAR ES SALAAM	TZ	-6.88	39.2	55	10/15/1962	-0.8	-4.4	2	90
DAR ES SALAAM	TZ	-6.88	39.2	55	11/15/1962	-0.7	-1.9	3.7	26
DAR ES SALAAM	TZ	-6.88	39.2	55	12/15/1962	-1.6	-6.9	5.9	76
DAR ES SALAAM	TZ	-6.88	39.2	55	1/15/1963	-0.4	-3.1	0.1	134
DAR ES SALAAM	TZ	-6.88	39.2	55	2/15/1963	-2	-5.3	10.7	90
DAR ES SALAAM	TZ	-6.88	39.2	55	3/15/1963	-2.7	-16.8	4.8	216
DAR ES SALAAM	TZ	-6.88	39.2	55	4/15/1963	-4.4	-19.9	15.3	446
DAR ES SALAAM	TZ	-6.88	39.2	55	5/15/1963	-1.1	-0.6	8.2	58
DAR ES SALAAM	TZ	-6.88	39.2	55	6/15/1963	-4.4	-25.5	9.7	85
DAR ES SALAAM	TZ	-6.88	39.2	55	7/15/1963	-0.6	5.6	10.4	14
DAR ES SALAAM	TZ	-6.88	39.2	55	8/15/1963	1.3	15.6	5.2	4
DAR ES SALAAM	TZ	-6.88	39.2	55	10/15/1963	-0.3	4.4	6.8	33
DAR ES SALAAM	TZ	-6.88	39.2	55	11/15/1963	-4.9	-37.2	2	392
DAR ES SALAAM	TZ	-6.88	39.2	55	12/15/1963	-1.3	-6.9	3.5	128
DAR ES SALAAM	TZ	-6.88	39.2	55	1/15/1964	-1.3	-8.1	2.3	68
DAR ES SALAAM	TZ	-6.88	39.2	55	2/15/1964	-3.1	-20.5	4.3	69
DAR ES SALAAM	TZ	-6.88	39.2	55	3/15/1964	-2.9	-18.6	4.6	209
DAR ES SALAAM	TZ	-6.88	39.2	55	5/15/1964	-2.9	-14.9	8.3	84
DAR ES SALAAM	TZ	-6.88	39.2	55	9/15/1964	1.1	18.7	9.9	8
DAR ES SALAAM	TZ	-6.88	39.2	55	10/15/1964	-1.3	-4.4	6	86
DAR ES SALAAM	TZ	-6.88	39.2	55	12/15/1964	-0.9	-3.8	3.4	101
DAR ES SALAAM	TZ	-6.88	39.2	55	1/15/1965	-0.6	8.1	12.9	23
DAR ES SALAAM	TZ	-6.88	39.2	55	2/15/1965	1.6	16.2	3.4	14
DAR ES SALAAM	TZ	-6.88	39.2	55	3/15/1965	-3.6	-16.8	12	39
DAR ES SALAAM	TZ	-6.88	39.2	55	4/15/1965	-4.3	-20.5	13.9	261
DAR ES SALAAM	TZ	-6.88	39.2	55	5/15/1965	-2.5	-11.2	8.8	140
DAR ES SALAAM	TZ	-6.88	39.2	55	6/15/1965	0.5	9.9	5.9	10
DAR ES SALAAM	TZ	-6.88	39.2	55	7/15/1965	2.6	18	-2.8	6
DAR ES SALAAM	TZ	-6.88	39.2	55	8/15/1965	-1	1.8	9.8	35
DAR ES SALAAM	TZ	-6.88	39.2	55	9/15/1965	-1	-0.6	7.4	21
DAR ES SALAAM	TZ	-6.88	39.2	55	10/15/1965	-0.7	8.7	14.3	33
DAR ES SALAAM	TZ	-6.88	39.2	55	11/15/1965	-3.7	-27.3	2.3	59
DAR ES SALAAM	TZ	-6.88	39.2	55	12/15/1965	-1.9	-5	10.2	91
DAR ES SALAAM	TZ	-6.88	39.2	55	1/15/1966	-4.2	-23.6	10	116
DAR ES SALAAM	TZ	-6.88	39.2	55	2/15/1966	-1.4	-6.9	4.3	82
DAR ES SALAAM	TZ	-6.88	39.2	55	3/15/1966	-3.8	-23.6	6.8	146
DAR ES SALAAM	TZ	-6.88	39.2	55	4/15/1966	-2.5	-10	10	251
DAR ES SALAAM	TZ	-6.88	39.2	55	5/15/1966	-1.8	-6.9	7.5	217
DAR ES SALAAM	TZ	-6.88	39.2	55	6/15/1966	-0.7	-0.6	5	59
DAR ES SALAAM	TZ	-6.88	39.2	55	7/15/1966	-0.3	-2.5	-0.1	13
DAR ES SALAAM	TZ	-6.88	39.2	55	8/15/1966	-1.5	-1.3	10.7	50
DAR ES SALAAM	TZ	-6.88	39.2	55	9/15/1966	-0.9	7.5	14.7	31
DAR ES SALAAM	TZ	-6.88	39.2	55	10/15/1966	0.4	13.1	9.9	37
DAR ES SALAAM	TZ	-6.88	39.2	55	12/15/1966	-1.3	1.8	12.2	38
DAR ES SALAAM	TZ	-6.88	39.2	55	1/15/1967	-2.49	-5.9	14.02	31
DAR ES SALAAM	TZ	-6.88	39.2	55	2/15/1967	-1.58	-3.9	8.74	82
DAR ES SALAAM	TZ	-6.88	39.2	55	3/15/1967	-1.87	-2.6	12.36	91
DAR ES SALAAM	TZ	-6.88	39.2	55	4/15/1967	-3.27	-14.5	11.66	320
DAR ES SALAAM	TZ	-6.88	39.2	55	5/15/1967	-1.99	-7.8	8.12	235
DAR ES SALAAM	TZ	-6.88	39.2	55	6/15/1967	-1.05	1.4	9.8	53
DAR ES SALAAM	TZ	-6.88	39.2	55	7/15/1967	-1.75	-6.5	7.5	82
DAR ES SALAAM	TZ	-6.88	39.2	55	8/15/1967	-0.99	3.4	11.32	40
DAR ES SALAAM	TZ	-6.88	39.2	55	9/15/1967	-1.76	-3.9	10.18	94
DAR ES SALAAM	TZ	-6.88	39.2	55	10/15/1967	-2.52	-11.8	8.36	86
DAR ES SALAAM	TZ	-6.88	39.2	55	11/15/1967	-2.79	-24.3	-1.98	191
DAR ES SALAAM	TZ	-6.88	39.2	55	12/15/1967	-2.76	-11.1	10.98	179
DAR ES SALAAM	TZ	-6.88	39.2	55	1/15/1968	0.96	10	2.32	6
DAR ES SALAAM	TZ	-6.88	39.2	55	2/15/1968	-3.85	-20.6	10.2	135
DAR ES SALAAM	TZ	-6.88	39.2	55	3/15/1968	-6.68	-37.3	16.14	306
DAR ES SALAAM	TZ	-6.88	39.2	55	4/15/1968	-4.94	-25.4	14.12	418
DAR ES SALAAM	TZ	-6.88	39.2	55	5/15/1968	-1.66	4	17.28	119
DAR ES SALAAM	TZ	-6.88	39.2	55	6/15/1968	-1.28	4.6	14.84	63
DAR ES SALAAM	TZ	-6.88	39.2	55	8/15/1968	-3.09	-13.4	11.32	13
DAR ES SALAAM	TZ	-6.88	39.2	55	9/15/1968	-2.72	-15.2	6.56	14
DAR ES SALAAM	TZ	-6.88	39.2	55	10/15/1968	-1.83	-10.4	4.24	87
DAR ES SALAAM	TZ	-6.88	39.2	55	11/15/1968	-1.78	-8	6.24	292
DAR ES SALAAM	TZ	-6.88	39.2	55	12/15/1968	-3.29	-17	9.32	110
DAR ES SALAAM	TZ	-6.88	39.2	55	1/15/1969	-3.52	-22.4	5.76	73
DAR ES SALAAM	TZ	-6.88	39.2	55	2/15/1969	-2.99	-17.7	6.22	82
DAR ES SALAAM	TZ	-6.88	39.2	55	3/15/1969	-2.34	-10.6	8.12	203
DAR ES SALAAM	TZ	-6.88	39.2	55	4/15/1969	-2.67	-17.7	3.66	300
DAR ES SALAAM	TZ	-6.88	39.2	55	5/15/1969	-3.61	-16.3	12.58	205
DAR ES SALAAM	TZ	-6.88	39.2	55	6/15/1969	-1.01	-0.9	7.18	22
DAR ES SALAAM	TZ	-6.88	39.2	55	7/15/1969	-0.16	6.2	7.48	21
DAR ES SALAAM	TZ	-6.88	39.2	55	8/15/1969	-3.12	-13.1	11.86	35
DAR ES SALAAM	TZ	-6.88	39.2	55	9/15/1969	0.32	8.1	5.54	24
DAR ES SALAAM	TZ	-6.88	39.2	55	10/15/1969	-1.66	-0.2	13.08	25
DAR ES SALAAM	TZ	-6.88	39.2	55	11/15/1969	-1.37	-2.1	8.86	134
DAR ES SALAAM	TZ	-6.88	39.2	55	12/15/1969	-8.95	-62.6	9	16
DAR ES SALAAM	TZ	-6.88	39.2	55	1/15/1970	-1.72	-10	3.76	111
DAR ES SALAAM	TZ	-6.88	39.2	55	2/15/1970	-1.59	1.7	14.42	42
DAR ES SALAAM	TZ	-6.88	39.2	55	3/15/1970	-2.39	-9.3	9.82	86
DAR ES SALAAM	TZ	-6.88	39.2	55	4/15/1970	-3.48	-22.2	5.64	181
DAR ES SALAAM	TZ	-6.88	39.2	55	5/15/1970	-1.78	-13	1.24	127
DAR ES SALAAM	TZ	-6.88	39.2	55	6/15/1970	-0.63	3.5	8.54	2
DAR ES SALAAM	TZ	-6.88	39.2	55	9/15/1970	-0.5	-0.7	3.3	59
DAR ES SALAAM	TZ	-6.88	39.2	55	10/15/1970	-0.66	-1.7	3.58	16
DAR ES SALAAM	TZ	-6.88	39.2	55	11/15/1970	-2.61	-10.6	10.28	20
DAR ES SALAAM	TZ	-6.88	39.2	55	12/15/1970	-2.48	-20.7	-0.86	209
DAR ES SALAAM	TZ	-6.88	39.2	55	5/15/1972	-2.73	-6.7	15.14	263
DAR ES SALAAM	TZ	-6.88	39.2	55	8/15/1972	-0.98	3.8	11.64	15
DAR ES SALAAM	TZ	-6.88	39.2	55	10/15/1972	-1.9	-1.9	13.3	132
DAR ES SALAAM	TZ	-6.88	39.2	55	11/15/1972	-2.08	-5.9	10.74	176
DAR ES SALAAM	TZ	-6.88	39.2	55	12/15/1972	-3.96	-16.8	14.88	135
DAR ES SALAAM	TZ	-6.88	39.2	55	1/15/1973	-2.77	-11.2	10.96	32
DAR ES SALAAM	TZ	-6.88	39.2	55	2/15/1973	-0.8	4.8	11.2	27
DAR ES SALAAM	TZ	-6.88	39.2	55	3/15/1973	-3.04	-9.9	14.42	82
DAR ES SALAAM	TZ	-6.88	39.2	55	4/15/1973	-3.98	-19.1	12.74	352
DAR ES SALAAM	TZ	-6.88	39.2	55	9/15/1973	-1.26	3.2	13.28	8
DAR ES SALAAM	TZ	-6.88	39.2	55	10/15/1973	-1.26	4.4	14.48	27
HARARE	ZW	-17.83	31.02	1471	1960-11-15	-0.4	8.7	11.9	67
HARARE	ZW	-17.83	31.02	1471	1961-01-15	-7	-42.8	13.2	200
HARARE	ZW	-17.83	31.02	1471	1961-02-15	-6.4	-41	10.2	198
HARARE	ZW	-17.83	31.02	1471	1961-03-15	-2.7	-13	8.6	96
HARARE	ZW	-17.83	31.02	1471	1961-04-15	-5.6	-29.2	15.6	115
HARARE	ZW	-17.83	31.02	1471	1961-05-15	3.9	34.2	3	13
HARARE	ZW	-17.83	31.02	1471	1961-06-15	0.4	11.2	8	24
HARARE	ZW	-17.83	31.02	1471	1961-07-15	-2.7	-7.5	14.1	1
HARARE	ZW	-17.83	31.02	1471	1961-08-15	-3.7	-20.5	9.1	2
HARARE	ZW	-17.83	31.02	1471	1961-10-15	-4.2	-21.1	12.5	51
HARARE	ZW	-17.83	31.02	1471	1961-11-15	-1	-5.6	2.4	209
HARARE	ZW	-17.83	31.02	1471	1962-01-15	-9.6	-63.2	13.6	196
HARARE	ZW	-17.83	31.02	1471	1962-02-15	-5.5	-31.6	12.4	99
HARARE	ZW	-17.83	31.02	1471	1962-03-15	-4.5	-20.5	15.5	58
HARARE	ZW	-17.83	31.02	1471	1962-04-15	-0.6	-5.6	-0.8	31
HARARE	ZW	-17.83	31.02	1471	1962-08-15	4.5	34.2	-1.8	1
HARARE	ZW	-17.83	31.02	1471	1962-10-15	2.8	24.8	2.4	2
HARARE	ZW	-17.83	31.02	1471	1962-11-15	-3.4	-13.7	13.5	90
HARARE	ZW	-17.83	31.02	1471	1963-01-15	-9.4	-66.4	8.8	197
HARARE	ZW	-17.83	31.02	1471	1963-02-15	-11	-84.2	3.8	348
HARARE	ZW	-17.83	31.02	1471	1963-03-15	-4.5	-29.2	6.8	50
HARARE	ZW	-17.83	31.02	1471	1963-04-15	-3.7	-12.4	17.2	52
HARARE	ZW	-17.83	31.02	1471	1963-10-15	-3.5	-12.4	15.6	163
HARARE	ZW	-17.83	31.02	1471	1963-11-15	-0.7	-1.3	4.3	15
HARARE	ZW	-17.83	31.02	1471	1964-01-15	-8.6	-62	6.8	132
HARARE	ZW	-17.83	31.02	1471	1964-02-15	-8	-55.1	8.9	208
HARARE	ZW	-17.83	31.02	1471	1964-03-15	-1.4	-10	1.2	8
HARARE	ZW	-17.83	31.02	1471	1964-04-15	0.4	-6.2	-9.4	6
HARARE	ZW	-17.83	31.02	1471	1964-05-15	-0.7	1.2	6.8	6
HARARE	ZW	-17.83	31.02	1471	1964-08-15	0.2	1.8	0.2	3
HARARE	ZW	-17.83	31.02	1471	1964-10-15	1.8	20.5	6.1	27
HARARE	ZW	-17.83	31.02	1471	1964-11-15	-3.9	-18	13.2	62
HARARE	ZW	-17.83	31.02	1471	1964-12-15	-7.4	-41	18.2	436
HARARE	ZW	-17.83	31.02	1471	1965-01-15	-6.9	-41.6	13.6	284
HARARE	ZW	-17.83	31.02	1471	1965-02-15	-2	-6.9	9.1	52
HARARE	ZW	-17.83	31.02	1471	1965-03-15	-4.7	-31	6.6	27
HARARE	ZW	-17.83	31.02	1471	1965-09-15	0.84	19.3	12.58	14
HARARE	ZW	-17.83	31.02	1471	1965-10-15	-0.53	6.7	10.94	24
HARARE	ZW	-17.83	31.02	1471	1965-11-15	-3.9	-9.1	22.1	90
HARARE	ZW	-17.83	31.02	1471	1966-01-15	-5.2	-31.6	10	90
HARARE	ZW	-17.83	31.02	1471	1966-02-15	-7.81	-45.5	16.98	249
HARARE	ZW	-17.83	31.02	1471	1966-03-15	-4.62	-28.3	8.66	70
HARARE	ZW	-17.83	31.02	1471	1966-04-15	-2.97	-1.9	21.86	107
HARARE	ZW	-17.83	31.02	1471	1966-05-15	-3.18	-4.6	20.84	49
HARARE	ZW	-17.83	31.02	1471	1966-06-15	0.6	24.5	19.7	8
HARARE	ZW	-17.83	31.02	1471	1966-08-15	-1.75	-0.6	13.4	1
HARARE	ZW	-17.83	31.02	1471	1966-09-15	0.04	16.6	16.28	10
HARARE	ZW	-17.83	31.02	1471	1966-11-15	0.33	19.2	16.56	52
HARARE	ZW	-17.83	31.02	1471	1966-12-15	-7.13	-42.1	14.94	118
HARARE	ZW	-17.83	31.02	1471	1967-01-15	-5.66	-30.3	14.98	248
HARARE	ZW	-17.83	31.02	1471	1967-02-15	-6.26	-29.6	20.48	234
HARARE	ZW	-17.83	31.02	1471	1967-03-15	-7.63	-34.2	26.84	103
HARARE	ZW	-17.83	31.02	1471	1967-04-15	-1.37	3.4	14.36	4
HARARE	ZW	-17.83	31.02	1471	1967-05-15	0.11	12.6	11.72	3
HARARE	ZW	-17.83	31.02	1471	1967-06-15	-0.94	9.3	16.82	11
HARARE	ZW	-17.83	31.02	1471	1967-08-15	-0.57	10.6	15.16	63
HARARE	ZW	-17.83	31.02	1471	1967-09-15	2.17	17.3	-0.06	1
HARARE	ZW	-17.83	31.02	1471	1967-10-15	-0.72	7.4	13.16	28
HARARE	ZW	-17.83	31.02	1471	1967-11-15	-1.91	4.7	19.98	49
HARARE	ZW	-17.83	31.02	1471	1967-12-15	-3.53	-12.5	15.74	142
HARARE	ZW	-17.83	31.02	1471	1968-06-15	-2.14	-10	7.12	2
HARARE	ZW	-17.83	31.02	1471	1968-08-15	-0.45	2.1	5.7	1
HARARE	ZW	-17.83	31.02	1471	1968-10-15	4.41	18	-17.28	1
HARARE	ZW	-17.83	31.02	1471	1968-11-15	-5.76	-32.2	13.88	121
HARARE	ZW	-17.83	31.02	1471	1968-12-15	-10.2	-66.9	14.7	169
HARARE	ZW	-17.83	31.02	1471	1970-03-15	-0.03	7	7.24	20
HARARE	ZW	-17.83	31.02	1471	1970-04-15	-3.63	-12	17.04	46
HARARE	ZW	-17.83	31.02	1471	1970-09-15	-0.8	7	13.4	1
HARARE	ZW	-17.83	31.02	1471	1970-10-15	0.66	15	9.72	14
HARARE	ZW	-17.83	31.02	1471	1970-11-15	-7.11	-40	16.88	248
HARARE	ZW	-17.83	31.02	1471	1970-12-15	-5.28	-27	15.24	95
HARARE	ZW	-17.83	31.02	1471	1971-01-15	-7.09	-42	14.72	132
HARARE	ZW	-17.83	31.02	1471	1971-02-15	-3.97	-17	14.76	130
HARARE	ZW	-17.83	31.02	1471	1971-03-15	-2.07	-4	12.56	60
HARARE	ZW	-17.83	31.02	1471	1971-04-15	-4.12	-20	12.96	44
HARARE	ZW	-17.83	31.02	1471	1971-05-15	-3.25	-10	16	34
HARARE	ZW	-17.83	31.02	1471	1971-06-15	-1.14	2	11.12	2
HARARE	ZW	-17.83	31.02	1471	1971-09-15	1.19	22	12.48	11
HARARE	ZW	-17.83	31.02	1471	1971-10-15	-0.58	12	16.64	46
HARARE	ZW	-17.83	31.02	1471	1971-11-15	-6.74	-36	17.92	98
HARARE	ZW	-17.83	31.02	1471	1971-12-15	-4.11	-18	14.88	104
HARARE	ZW	-17.83	31.02	1471	1972-01-15	-8.41	-52.2	15.08	352
HARARE	ZW	-17.83	31.02	1471	1972-02-15	-14.36	-101.4	13.48	150
HARARE	ZW	-17.83	31.02	1471	1972-03-15	-4.69	-24.1	13.42	148
HARARE	ZW	-17.83	31.02	1471	1972-04-15	-3.9	-17.5	13.7	60
HARARE	ZW	-17.83	31.02	1471	1972-05-15	-3.64	-13.6	15.52	22
HARARE	ZW	-17.83	31.02	1471	1972-07-15	-1.98	8.7	24.54	5
HARARE	ZW	-17.83	31.02	1471	1972-09-15	1.5	19.4	7.4	30
HARARE	ZW	-17.83	31.02	1471	1972-12-15	-4.15	-27.5	5.7	38
HARARE	ZW	-17.83	31.02	1471	1973-02-15	-3.5	-16	12	23
HARARE	ZW	-17.83	31.02	1471	1973-04-15	-4.9	-20.4	18.8	25
HARARE	ZW	-17.83	31.02	1471	1973-05-15	-2.07	18	34.56	2
HARARE	ZW	-17.83	31.02	1471	1973-07-15	3.02	21.5	-2.66	1
HARARE	ZW	-17.83	31.02	1471	1973-10-15	-3.56	-7.4	21.08	52
HARARE	ZW	-17.83	31.02	1471	1973-11-15	-6.95	-34.9	20.7	214
HARARE	ZW	-17.83	31.02	1471	1973-12-15	-8	-42.9	21.1	309
HARARE	ZW	-17.83	31.02	1471	1974-01-15	-7.68	-41	20.44	142
HARARE	ZW	-17.83	31.02	1471	1974-02-15	-8.96	-43.2	28.48	324
HARARE	ZW	-17.83	31.02	1471	1974-03-15	-9.29	-50.6	23.72	111
HARARE	ZW	-17.83	31.02	1471	1974-04-15	-7.37	-31	27.96	30
HARARE	ZW	-17.83	31.02	1471	1974-05-15	-6.98	-26.5	29.34	32
HARARE	ZW	-17.83	31.02	1471	1975-01-15	-4.61	-21.5	15.38	115
HARARE	ZW	-17.83	31.02	1471	1975-03-15	-6.57	-46.3	6.26	45
HARARE	ZW	-17.83	31.02	1471	1975-04-15	-1.68	-4.6	8.84	68
HARARE	ZW	-17.83	31.02	1471	1975-10-15	-0.05	11.7	12.1	48
HARARE	ZW	-17.83	31.02	1471	1989-10-15	-2.51	-4.7	15.38	33
HARARE	ZW	-17.83	31.02	1471	1989-11-15	-2.64	-5.2	15.92	97
HARARE	ZW	-17.83	31.02	1471	1989-12-15	-5.35	-33.3	9.5	71
HARARE	ZW	-17.83	31.02	1471	1990-01-15	-4.06	-21.5	10.98	261
HARARE	ZW	-17.83	31.02	1471	1990-02-15	-6.06	-33.1	15.38	180
HARARE	ZW	-17.83	31.02	1471	1990-03-15	-3.5	-9.9	18.1	68
HARARE	ZW	-17.83	31.02	1471	1990-04-15	-1.98	-0.3	15.54	31
HARARE	ZW	-17.83	31.02	1471	1990-11-15	-5.29	-31.8	10.52	68
HARARE	ZW	-17.83	31.02	1471	1991-01-15	-6.29	-38.9	11.42	183
HARARE	ZW	-17.83	31.02	1471	1991-02-15	-5.43	-26.3	17.14	80
HARARE	ZW	-17.83	31.02	1471	1991-03-15	-6.95	-45.4	10.2	46
HARARE	ZW	-17.83	31.02	1471	1991-11-15	-0.99	4.4	12.32	73
HARARE	ZW	-17.83	31.02	1471	1991-12-15	-3.33	-8.5	18.14	180
HARARE	ZW	-17.83	31.02	1471	1992-01-15	-5.35	-26.9	15.9	62
HARARE	ZW	-17.83	31.02	1471	1992-02-15	-1.32	-0.2	10.36	25
HARARE	ZW	-17.83	31.02	1471	1992-03-15	-1.5	-2.1	9.9	110
HARARE	ZW	-17.83	31.02	1471	1992-04-15	-3.34	-7.8	18.92	89
HARARE	ZW	-17.83	31.02	1471	1992-12-15	-8.82	-57.1	13.46	201
HARARE	ZW	-17.83	31.02	1471	1993-01-15	-5.36	-31.5	11.38	159
HARARE	ZW	-17.83	31.02	1471	1993-02-15	-5.93	-35.7	11.74	321
HARARE	ZW	-17.83	31.02	1471	1993-03-15	-2.94	-9.1	14.42	134
HARARE	ZW	-17.83	31.02	1471	1993-04-15	-1.8	-0.7	13.7	65
HARARE	ZW	-17.83	31.02	1471	1993-11-15	-2.39	-11.2	7.92	123
HARARE	ZW	-17.83	31.02	1471	1993-12-15	-1.1	3.1	11.9	159
HARARE	ZW	-17.83	31.02	1471	1994-01-15	-3.97	-19.8	11.96	227
HARARE	ZW	-17.83	31.02	1471	1994-02-15	-3.92	-17.2	14.16	156
HARARE	ZW	-17.83	31.02	1471	1994-03-15	-1.12	1.5	10.46	47
HARARE	ZW	-17.83	31.02	1471	1994-10-15	-1.66	1.2	14.48	106
HARARE	ZW	-17.83	31.02	1471	1994-11-15	-0.51	6.3	10.38	24
HARARE	ZW	-17.83	31.02	1471	1994-12-15	-6.66	-44.4	8.88	132
HARARE	ZW	-17.83	31.02	1471	1995-01-15	-7.42	-44.4	14.96	155
HARARE	ZW	-17.83	31.02	1471	1995-02-15	-1.4	2.2	13.4	96
HARARE	ZW	-17.83	31.02	1471	1995-11-15	0.445	8.6	5.04	37
HARARE	ZW	-17.83	31.02	1471	1995-12-15	-5.58	-30.4	14.24	205
HARARE	ZW	-17.83	31.02	1471	1996-01-15	-2.27	-3.6	14.56	263
HARARE	ZW	-17.83	31.02	1471	1996-02-15	-7.1	-44.6	12.2	240
HARARE	ZW	-17.83	31.02	1471	1996-03-15	-7.31	-46.4	12.08	154
HARARE	ZW	-17.83	31.02	1471	1996-11-15	-0.37	10	12.96	88
HARARE	ZW	-17.83	31.02	1471	1996-12-15	-3.145	-11.4	13.76	271
HARARE	ZW	-17.83	31.02	1471	1997-01-15	-8.73	-58.2	11.64	292
HARARE	ZW	-17.83	31.02	1471	1997-02-15	-12.07	-84.4	12.16	176
HARARE	ZW	-17.83	31.02	1471	1997-03-15	-8.1	-51	13.8	152
HARARE	ZW	-17.83	31.02	1471	1997-11-15	-6.49	-39.6	12.32	186
HARARE	ZW	-17.83	31.02	1471	1997-12-15	-4.79	-27	11.32	32
HARARE	ZW	-17.83	31.02	1471	1998-01-15	-12.25	-86.3	11.7	327
HARARE	ZW	-17.83	31.02	1471	1998-02-15	-16.84	-122.1	12.62	42
HARARE	ZW	-17.83	31.02	1471	1998-03-15	-1.67	-2.2	11.16	220
HARARE	ZW	-17.83	31.02	1471	1998-11-15	-4.7	-23.1	14.5	118
HARARE	ZW	-17.83	31.02	1471	1998-12-15	-5.57	-29.5	15.06	269
HARARE	ZW	-17.83	31.02	1471	1999-01-15	-9.06	-62	10.48	416
HARARE	ZW	-17.83	31.02	1471	1999-02-15	-10.19	-69.45	12.07	217
HARARE	ZW	-17.83	31.02	1471	1999-10-15	0.58	14.8	10.16	57
HARARE	ZW	-17.83	31.02	1471	1999-11-15	-2.515	-11.65	8.47	83
HARARE	ZW	-17.83	31.02	1471	1999-12-15	-3.27	-15.75	10.41	119
HARARE	ZW	-17.83	31.02	1471	2000-01-15	-6.71	-39.2	14.48	228
HARARE	ZW	-17.83	31.02	1471	2000-02-15	-9.52	-64.95	11.21	163.7
HARARE	ZW	-17.83	31.02	1471	2000-03-15	-6.95	-43.85	11.75	221
HARARE	ZW	-17.83	31.02	1471	2000-04-15	-2.69	-6.45	15.07	101.5
HARARE	ZW	-17.83	31.02	1471	2000-05-15	-4.23	-14.6	19.24	116
HARARE	ZW	-17.83	31.02	1471	2000-10-15	-5.02	-29.2	10.96	21.7
HARARE	ZW	-17.83	31.02	1471	2000-11-15	-4.12	-20.6	12.36	112.7
HARARE	ZW	-17.83	31.02	1471	2000-12-15	-8.39	-53.85	13.27	257.3
HARARE	ZW	-17.83	31.02	1471	2001-01-15	-5.37	-31.3	11.66	116.1
HARARE	ZW	-17.83	31.02	1471	2001-02-15	-8.82	-58.4	12.16	419.3
HARARE	ZW	-17.83	31.02	1471	2001-03-15	-3.73	-15.1	14.74	219.5
HARARE	ZW	-17.83	31.02	1471	2001-10-15	3.68	16.2	-13.24	12.4
HARARE	ZW	-17.83	31.02	1471	2001-11-15	-0.91	5.6	12.88	50.4
HARARE	ZW	-17.83	31.02	1471	2001-12-15	-4.01	-16.8	15.28	282.1
HARARE	ZW	-17.83	31.02	1471	2002-01-15	-3.46	-13.45	14.23	109
HARARE	ZW	-17.83	31.02	1471	2002-02-15	-0.98	5.9	13.74	1
HARARE	ZW	-17.83	31.02	1471	2002-03-15	-3.43	-15.4	12.04	29
HARARE	ZW	-17.83	31.02	1471	2002-04-15	-6.4	-37.1	14.1	60
HARARE	ZW	-17.83	31.02	1471	2002-06-15	-2.82	-0.2	22.36	10
HARARE	ZW	-17.83	31.02	1471	2002-10-15	-2.69	-9.75	11.77	97
HARARE	ZW	-17.83	31.02	1471	2002-11-15	-3.98	-16.5	15.34	73
HARARE	ZW	-17.83	31.02	1471	2002-12-15	-3.07	-11.3	13.26	92
Central Water Laboratory	MW	-13.9711	33.7686	1046	2016-04-01	-1.4	3.75	14.95	68.2
Central Water Laboratory	MW	-13.9711	33.7686	1046	2015-04-01	-0.29	8.4	10.72	55.8
Central Water Laboratory	MW	-13.9711	33.7686	1046	2016-12-01	-8.71	-56	13.68	85.9
Central Water Laboratory	MW	-13.9711	33.7686	1046	2017-12-31	-7.63	-47.6	13.44	281.6
Central Water Laboratory	MW	-13.9711	33.7686	1046	2018-12-31	-5.975	-32.5	15.3	160
Central Water Laboratory	MW	-13.9711	33.7686	1046	2015-12-01	-5.33	-24	18.64	77.3
Central Water Laboratory	MW	-13.9711	33.7686	1046	2015-02-23	-6.83	-51.5	3.14	151.4
Central Water Laboratory	MW	-13.9711	33.7686	1046	2018-02-26	-7.53	-44.4	15.84	160.6
Central Water Laboratory	MW	-13.9711	33.7686	1046	2014-02-15	-6.95	-42.3	13.3	290.2
Central Water Laboratory	MW	-13.9711	33.7686	1046	2019-02-14	-6.64	-38.1	15.02	45
Central Water Laboratory	MW	-13.9711	33.7686	1046	2019-01-07	-8.24	-50.7	15.22	281
Central Water Laboratory	MW	-13.9711	33.7686	1046	2016-01-01	-4.71	-20.3	17.38	282.8
Central Water Laboratory	MW	-13.9711	33.7686	1046	2016-03-01	-5.97	-30.8	16.96	72.4
Central Water Laboratory	MW	-13.9711	33.7686	1046	2018-03-31	-4.8	-24.2	14.2	106.8
Central Water Laboratory	MW	-13.9711	33.7686	1046	2015-12-01	-8.71	-56	13.68	77.3
Central Water Laboratory	MW	-13.9711	33.7686	1046	2016-02-01	-5.33	-24	18.64	149.1
Central Water Laboratory	MW	-13.9711	33.7686	1046	2017-11-29	-7.49	-44.3	15.62	81.3
Central Water Laboratory	MW	-13.9711	33.7686	1046	2018-11-04	-6.56	-37.9	14.58	38
CR Collection Point	MW	-16.1392	35.6306	1127	2018-12-01	-9.59	-66.8	9.92	434
CR Collection Point	MW	-16.1392	35.6306	1127	2019-01-01	-10.27	-68.41	13.75	399.5
CR Collection Point	MW	-16.1392	35.6306	1127	2019-02-01	-6.133	-34.6	14.464	145.1
CR Collection Point	MW	-16.1392	35.6306	1127	2019-03-01	-8.789	-58.9	11.412	369.1
CR Collection Point	MW	-16.1392	35.6306	1127	2019-04-01	-2.75	-4.3	17.7	66.7
Mzuni Met Service Station	MW	-11.4152	33.9953	1287	2017-12-20	-8.965	-57.85	13.87	43.9
Mzuni Met Service Station	MW	-11.4152	33.9953	1287	2019-02-10	-7.43	-47	12.44	78.4
Mzuni Met Service Station	MW	-11.4152	33.9953	1287	2018-02-14	-3.71	-14.73	14.95	104.5
Mzuni Met Service Station	MW	-11.4152	33.9953	1287	2019-02-11	-2.22	-19.4	-1.64	141.6
Mzuni Met Service Station	MW	-11.4152	33.9953	1287	2018-01-10	-7.016	-42.24	13.888	293.1
Mzuni Met Service Station	MW	-11.4152	33.9953	1287	2019-03-07	-6.58	-36.2	16.44	148.3
Ngabu Met Service Station	MW	-16.5303	34.8912	80	2018-12-28	-6.22	-37.65	12.11	233
Ngabu Met Service Station	MW	-16.5303	34.8912	80	2019-02-15	-7.58	-48.4	12.24	142.1
Ngabu Met Service Station	MW	-16.5303	34.8912	80	2019-01-11	-6.815	-47.1	7.42	175.9
Ngabu Met Service Station	MW	-16.5303	34.8912	80	2018-11-23	-3.75	-18.55	11.45	102
Ngabu Meteorological Station	MW	-16.5303	34.8912	80	2017-12-29	-8.915	-57.65	13.67	89
Ngabu Meteorological Station	MW	-16.5303	34.8912	80	2018-02-09	-4.195	-24.7	8.86	80.7
Ngabu Meteorological Station	MW	-16.5303	34.8912	80	2018-01-19	-2.51	-6	14.08	103.2
Salima Meteorological Station	MW	-13.754	34.5844	513	2018-12-22	-7.63	-48.1	12.94	528
Salima Meteorological Station	MW	-13.754	34.5844	513	2017-12-29	-4.943	-25.1	14.444	201.2
Salima Meteorological Station	MW	-13.754	34.5844	513	2018-02-02	-7.26	-44.45	13.63	330.4
Salima Meteorological Station	MW	-13.754	34.5844	513	2018-01-12	-3.5833	-13.4666	15.1998	34.4
